# Supplementary material for: Predicting the pathogenicity of bacterial genomes using widely spread protein families
Source: Springer Nature journal article supplement (doi:10.1186/s12859-022-04777-w), 2022-06-24
Supplement: 12859_2022_4777_MOESM1_ESM.pdf [file 12859_2022_4777_MOESM1_ESM.pdf]

# Supplementary Materials

Shaked Naor-Hoffmann<sup>† 1</sup>, Dina Svetlitsky<sup>†1</sup>, Neta Sal-Man<sup>2</sup>, Yaron Orenstein<sup>3</sup>, and Michal Ziv-Ukelson<sup>1</sup>

<sup>1</sup>Department of Computer Science, Ben Gurion University of the Negev, Be'er Sheva, Israel

<sup>2</sup>The Shraga Segal Department of Microbiology, Immunology and Genetics, Faculty of Health Sciences, Ben-Gurion University of the Negev, Be'er-Sheva, Israel

<sup>3</sup>School of Electrical and Computer Engineering, Ben-Gurion University of the Negev, Be'er Sheva, Israel

## Contents

|                                                                                  |    |
|----------------------------------------------------------------------------------|----|
| S1 Previous Works . . . . .                                                      | 3  |
| S2 Dataset Creation Process . . . . .                                            | 4  |
| S2.1 Labeling Method . . . . .                                                   | 4  |
| S2.2 Manual Inspection of the WSPC Test Set Genomes . . . . .                    | 5  |
| S2.3 Manual Verification of the BacPaCS Test Set Genomes . . . . .               | 6  |
| S3 Methods . . . . .                                                             | 7  |
| S3.1 Evaluation Metrics . . . . .                                                | 7  |
| S3.2 Feature Selection of the WSPC Classifier - Parameter Tuning . . . . .       | 8  |
| S3.3 Mean Decrease Impurity Measure Computation for Feature Importance . . . . . | 9  |
| S4 Classification Performance Comparison on Benchmark Test 1 . . . . .           | 9  |
| S5 Biological Interpretation . . . . .                                           | 9  |
| S5.1 A Detailed Description of Each of the Top HP PGFams . . . . .               | 9  |
| S5.2 Top NHP Features . . . . .                                                  | 12 |
| S6 BacPaCS Test Genomes . . . . .                                                | 14 |
| S7 WSPC Test Genomes . . . . .                                                   | 16 |

## List of Figures

|                                                                                                                                                  |   |
|--------------------------------------------------------------------------------------------------------------------------------------------------|---|
| S1 Selecting the most discriminative features and removing highly correlated features . . . . .                                                  | 8 |
| S2 Classification performance comparison between WSPC and extant classifiers on 94 out of 100 genomes of the original BacPaCS test set . . . . . | 9 |

---

<sup>†</sup>S.N.H and D.S. are equal contributors

## List of Tables

|    |                                                              |    |
|----|--------------------------------------------------------------|----|
| S1 | Top NHP PGFams of the WSPC classifier . . . . .              | 13 |
| S2 | A list of genomes included in the BacPaCS test set . . . . . | 16 |
| S3 | A list of genomes included in the WSPC test set . . . . .    | 23 |

## S1 Previous Works

In this section, we review previous computational methods for pathogenicity classification. The methods can be divided into two main categories: Read-based methods and protein-content-based methods.

**Read-based Methods.** Read-based classification approaches use short genomic reads as raw input, and hence do not depend on assembled genomes or on coding sequences. Several tools were proposed for the detection of pathogens in metagenomic reads based on mapping the reads to a species, genus, or phylum of reference genomes, and/or based on their sequence composition homology [1]. However, these methods were mainly designed for taxonomic assignment using known species that are present in a reference database, rather than for pathogenicity predictions. In addition to the taxonomy-dependent methods, several taxonomy-agnostic read-based methods were designed specifically for pathogenicity predictions [2, 3]. In 2017, Deneke *et al.* published PaPrBaG [2], an RF approach that uses classification features of two types:  $k$ -mer occurrence-based features and peptide features. PaPrBaG assigns pathogenicity prediction to each read in a genome sample, and computes the final prediction of the genome by averaging over all of its read-based prediction probabilities. A more recent read-based taxonomy-agnostic classification tool is DeePaC [3], which applies reverse-complement convolutional and recurrent neural networks to the classification task.

**Protein-content-based Methods.** Protein-content-based methods are classification approaches that require the availability of assembled and annotated genomes as they characterize a bacterial genome by the presence or absence of protein family members [4, 5, 6, 7].

Iraola *et al.* [5] constructed an SVM-based model to classify a bacteria, based on its genome, as a human pathogen or a non-pathogen using protein families annotated as virulence genes. Thus, their method has the disadvantage of not taking into account other protein families that could be associated with either HP or NHP phenotypes. Other protein-content-based tools constructed new protein families instead of relying on existing ones [4, 6, 7]. Andreatta *et al.* [4] developed a method to predict human pathogenicity in  $\gamma$ -Proteobacteria. They clustered new protein families using BLAST, and identified protein families that distinguish between the two phenotypes by their enrichment in either pathogens or non-pathogens. The pathogenicity of a new bacterium was determined by the presence or absence of proteins that belong to these distinguishing protein families in its genome. Building on the former method, Cosentino *et al.* [6] developed PathogenFinder, a similar method extended to handle a variety of bacterial taxonomic groups. In order to reduce the method’s runtime, CD-HIT was used instead of BLAST in the protein family clustering step of the algorithm, which took four weeks for a dataset of 885 genomes.

Recently, Barash *et al.* [7] developed BacPaCS, a sparse-SVM-based method for bacterial pathogenicity classification. Barash *et al.* also used CD-HIT for the construction of protein families, but in order to reduce the runtime of the clustering phase and to scale up the method to larger training data, only the top 10% of the longest gene sequences in the training set were used for the construction of protein families. Although this selection reduced the estimated runtime from 8 months to 12 days (for 21,155 genomes), the clustering step still remained the most computationally expensive step of the

training in all the aforementioned methods. Furthermore, when examining the top-scoring features of the BacPaCS classifier, as reported in the paper, it is evident that many of the top-ranking features appear in only a few genomes, which may hamper the classifier’s ability to contribute to the general understanding of pathogenic lifestyle, or to predict the pathogenicity of novel bacterial species.

The number of available sequenced strains per bacterial species varies greatly, mainly due to a bias towards pathogen studies [2]. Thus, the distribution of strains per species in a given database may not represent their distribution in the real world or in future applications. Consequently, this may result in a training dataset and a classifier that are biased towards specific species. Existing read-based methods addressed this issue by selecting one strain per species for their training sets [2, 3]. However, previous protein-content-based methods [4, 6, 7] did not properly address this normalization issue, and thus their generality may be at fault.

## S2 Dataset Creation Process

### S2.1 Labeling Method

To identify the HP and NHP bacteria in our dataset, we initially followed Barash *et al.* [7] annotation-based pathogenicity classification method, as described below:

1. Genomes are labeled as HP if they satisfy any of the following criteria:
  - (a) The ‘Disease’ field is not empty, and does not contain a commensal term, as defined below.
  - (b) One of the fields ‘Isolation Source’, ‘Host Health’, or ‘Comments’ includes an HP term. In addition, the same fields cannot include any of the NHP terms (the terms used for HP and NHP are presented below).
  - (c) A genome was manually verified as HP, by reviewing it in the literature.
2. Excluding the generated HP list, genomes are labeled as NHP if they satisfy any of the following criteria:
  - (a) One of the fields ‘Isolation Source’, ‘Host Health’, or ‘Comments’ includes an NHP term.
  - (b) One of the fields ‘Isolation Source’, ‘Host Health’, or ‘Comments’ includes a weaker NHP term.
3. The following term lists were used for the criteria above:
  - HP terms: virulence, disease, superbug, patient, diarrhea, waterborne, foodborne, toxin, clinical, intensive, outbreak, infection, pathogen, water borne, food borne.
  - NHP terms: healthy, probiotic, commensal.
  - Weaker NHP terms: ‘comparative’, ‘reference’.
  - Commensal terms: ‘healthy’, ‘Healthy’, ‘Commensal’, ‘Commensal (plant)’, ‘Periodontally healthy’.

A manual examination of a random sample from the training set revealed that some of the genomes were mislabeled. These labeling mistakes were caused by using keywords that can both describe HP and NHP genomes. In addition, a manual examination of a random sample from the group of genomes that were labeled as inconclusive revealed that some genomes could be labeled by utilizing additional keywords and fields. Therefore, the following modifications to the annotation process were made:

- ‘Other Clinical’ and ‘Isolation Comments’ were added to the list of relevant fields in 1(b) and 2(a).
- The word ‘intensive’ was removed from the HP terms.
- The words ‘microbiome’ and ‘microbiota’ were added to the NHP terms.
- All the weaker NHP terms were removed.

This rule-based labeling process correctly identifies HP genomes due to the pathogenic sample collection process. First, the PATRIC database utilizes information from standard medical practice in which clinical samples are taken from diseased individuals based on the illness symptoms. Thus, the decision of which sample to take (e.g., stool, urine, blood, nasal swab, sputum swab) is illness-related. Second, the samples are processed based on the suspected pathogens, i.e., cultured using specific conditions that will allow the growth of the suspected pathogen. Therefore, in the case of an identification of a bacterial strain, it can be medically referred to as the infectious agent.

## S2.2 Manual Inspection of the WSPC Test Set Genomes

We manually inspected all the genomes in the WSPC test set (Section 2.1.3, main text) to ensure that their labels are correct by reviewing the associated PATRIC metadata. We verified a genome as HP if the isolation source is a diseased individual, and as NHP if the isolation source is a healthy individual or a probiotic supplement. Additionally, we performed a literature search to confirm the corresponding label.

The following strains could not be verified as HP or NHP:

1. The PATRIC metadata of a strain belonging to the species *Escherichia marmotae* (Genome ID: 1499973.23) indicated that it was collected as part of a study that sequenced metagenomes from urinary tract patients as well as from a control group. There was no indication to which of the two groups this strain belonged, and it was thus removed from the test set.
2. The PATRIC metadata of a strain belonging to an unclassified species of the genus *Starkeya* (Genome ID: 2666134.3) indicated that the host health status is diseased. However, this genus includes soil bacteria [8], and we were not able to find a study suggesting that *Starkeya* species could be pathogenic. Therefore, this genome was removed from the test set.

In addition, two strains were mislabeled by the automatic annotation. A strain of the species *Bacillus clausii* was labeled HP because of the keyword “disease” in the “Comments” field. The full sentence “Genome analysis of *Bacillus clausii* B619/R for evaluation of its health promoting and disease

preventing properties” indicates that it is a commensal probiotic bacterium, which is also supported by the literature [9]. Therefore, its label was corrected to NHP. A strain of the unclassified species *Clostridium sp. C5-48* was labeled as HP because of the keyword ”patient” in the isolation source field. However, this strain was collected from the feces of an alcoholic patient to study his metagenomic population in the colon, and a different database indicates that this strain is commensal [10]. Therefore, its label was corrected to NHP.

### S2.3 Manual Verification of the BacPaCS Test Set Genomes

We manually curated the 100 genomes included in the BacPaCS test set using the metadata associated with each genome and the literature. We verified a genome label as HP if it was isolated from a diseased host (based on the PARTIC database entry), and if there was also evidence in the literature that the corresponding species or strain is pathogenic. We verified a genome label as NHP if it was isolated from a healthy host, and if the corresponding species or strain was also described in the literature as commensal or probiotic.

A list of all the genomes included in the original BacPaCS test set along with their verified labels, references to relevant studies, as well as an indication of whether each genome was included in Benchmark Test 2, is given in Table S2. In what follows, we summarize the modifications we made following the verification process.

1. A total of 18 strains belonging to the species *Pseudomonas aeruginosa*, *Acinetobacter nosocomialis*, *Streptococcus sp. NPS 3089*, *Acinetobacter baumannii*, *Escherichia coli*, and *Enterococcus faecium* were originally labeled as NHP, but were verified by us as HP as these strains were isolated from clinical samples or described in the literature as well-known pathogenic strains. This may explain the discrepancy between the pathogenicity annotations detected by Bartosezewitch *et al.* [3].
2. The labels of another six strains belonging to the species *Fusobacterium nucleatum*, *Fusobacterium periodonticum* and *Rothia aeria*, could not be verified by us as neither HP nor NHP:
  - The species *Fusobacterium nucleatum* included one strain that was collected from subgingival dental plaque (which may be an initiating factor in periodontal diseases [11]) and the species *Fusobacterium periodonticum* included four strains that were collected from the tongue or from dental plaque. For these genomes there was no indication in the corresponding metadata whether the hosts carried a periodontal disease. The species *Fusobacterium nucleatum* and *Fusobacterium periodonticum* are associated with a wide spectrum of human periodontal diseases [12, 13]. Therefore, these strains could not be reliably labeled and were removed from the test set.
  - The species *Rothia aeria* included one strain, which was isolated from an air sample of the living environment in the Mir space station [14]. *Rothia aeria* is described as an opportunistic periodontal pathogen that causes infections of immunocompromised patients and neonates, but its virulent features remain uncertain [14]. As it was collected from the

environment, it is not clear whether this specific strain can cause disease, and therefore it was removed from the test set.

## **S3 Methods**

### **S3.1 Evaluation Metrics**

Some of the test sets used in this paper consist of more HP than NHP labeled genomes. Using a regular accuracy metric (the proportion of correct predictions in the test set) may result in misleading classification evaluation due to the imbalance between the two classes. Therefore, we used Sensitivity (true positive rate), Specificity (true negative rate), and Balanced Accuracy (BACC), which denotes the mean of sensitivity and specificity [15]. In addition, for ranking evaluation of WSPC, we used the areas under the precision recall (AUPR) [16], and the receiver operation characteristic (AUROC) [17] curves. Since AUROC considers the ranking of all predictions while accuracy only considers a single prediction threshold (i.e., 0.5) [18], we used AUROC for the feature selection parameter tuning (Section S3.2 and Section 2.4.3 in the main text). Note that in the case of a highly imbalanced dataset, AUPR is more informative than AUROC [19]. However, since there is only a slight imbalance between the classes of the validation set (ratio of 2:1 HP to NHP), and as AUROC is more commonly used than AUPR in the general case, we opted to use AUROC for the purpose of parameter tuning.

### S3.2 Feature Selection of the WSPC Classifier - Parameter Tuning

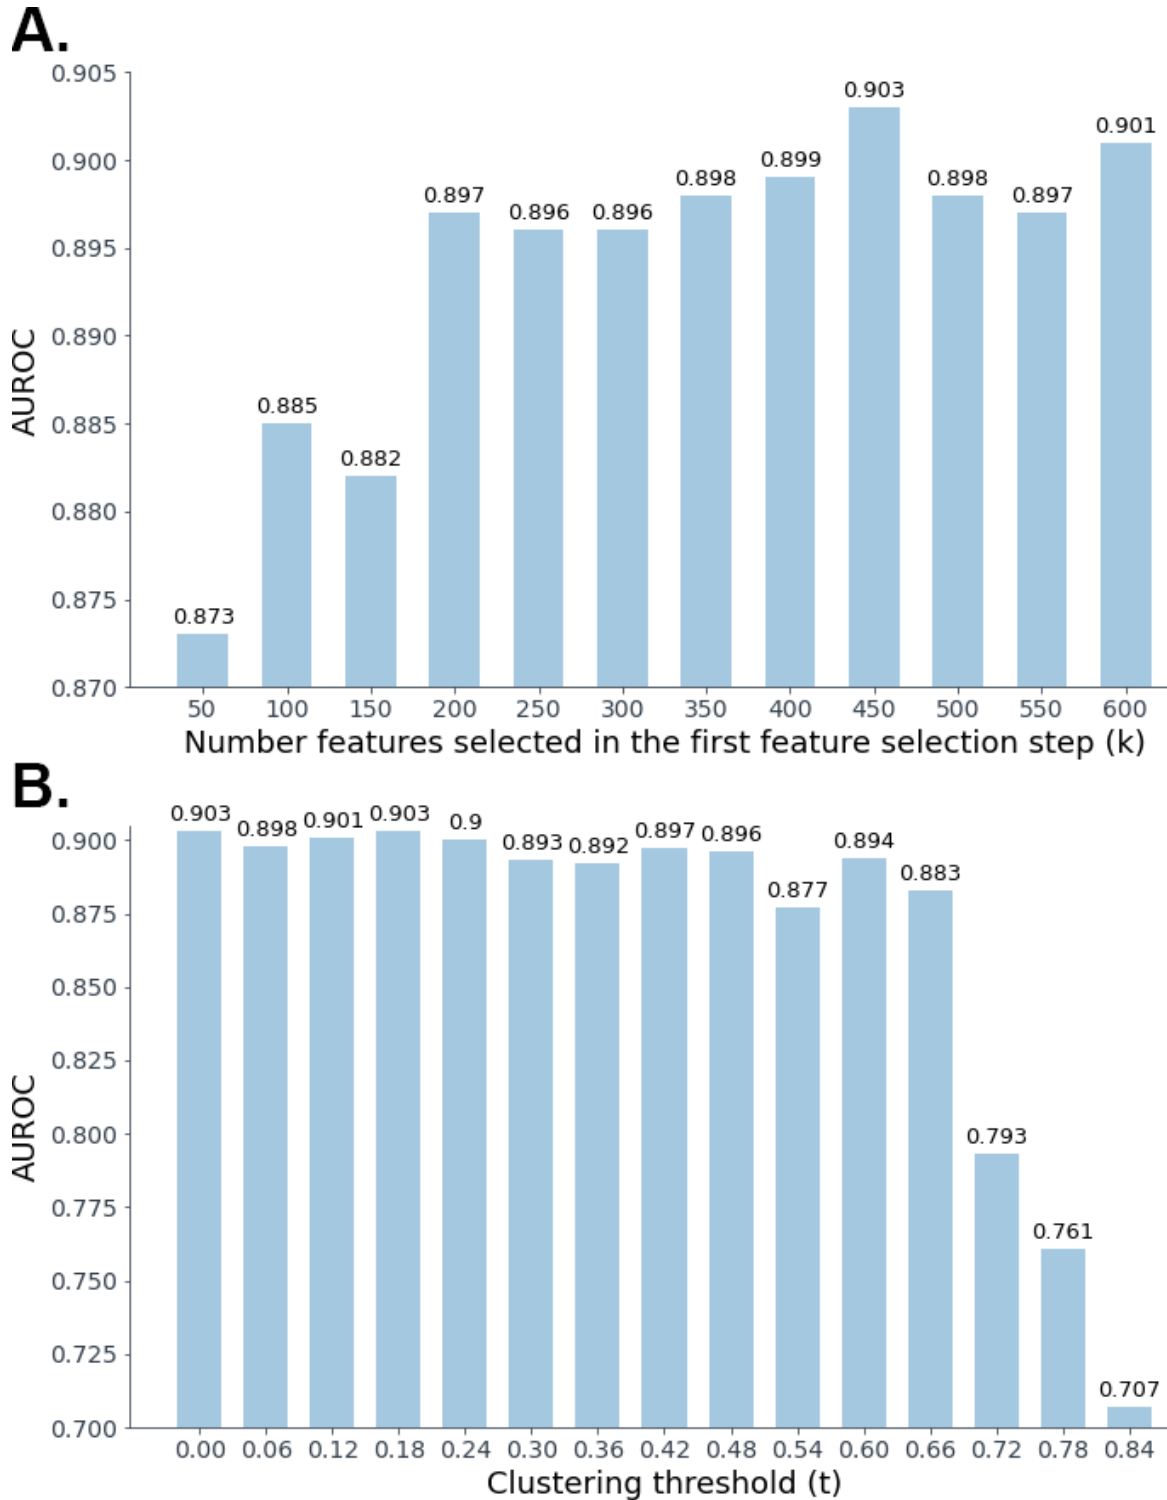

**Figure S1:** Performance evaluation of the RF classifier using different values for the  $k$  and  $t$  parameters of the two-step feature selection process (Section 2.4.3, main text). We trained on the training set, and evaluated on the validation set. **A.** AUROC values achieved by the classifier, as a function of  $k$  - the number of features selected in the first feature selection step (based on their  $\chi^2$  scores, without correlation reduction). The maximum value was obtained for  $k = 450$ . **B.** AUROC values achieved by the classifier using different subsets of the 450 features selected in the first feature selection step, as a function of  $t$  - the clustering threshold. The maximum value was obtained for  $t = 0.18$  resulting in a subset of 244 features, and is equal to the AUROC score value obtained before removing correlated features ( $t = 0$ ).



### S3.3 Mean Decrease Impurity Measure Computation for Feature Importance

The Mean Decrease Impurity (MDI) importance measure [20, 21] of a feature of interest is computed by the Scikit-learn python package [22] as follows:

1. For each tree in the forest, the total decrease in Gini impurity in all the splits that use this feature, weighted by the proportion of samples reaching that split, is computed.
2. The resulting value in each tree is averaged over all trees in the forest

Consequently, the MDI values for all features sum to one. Thus, an “important” feature is often selected for tree splits and yields a high decrease of Gini impurity, leading to a high MDI. To evaluate the feature importance of each PGFam feature in the final set of features, we computed its average MDI value using 100 RF classifiers with different random seeds (seeds 0-99) trained on the combined training and validation sets.

## S4 Classification Performance Comparison on Benchmark Test 1

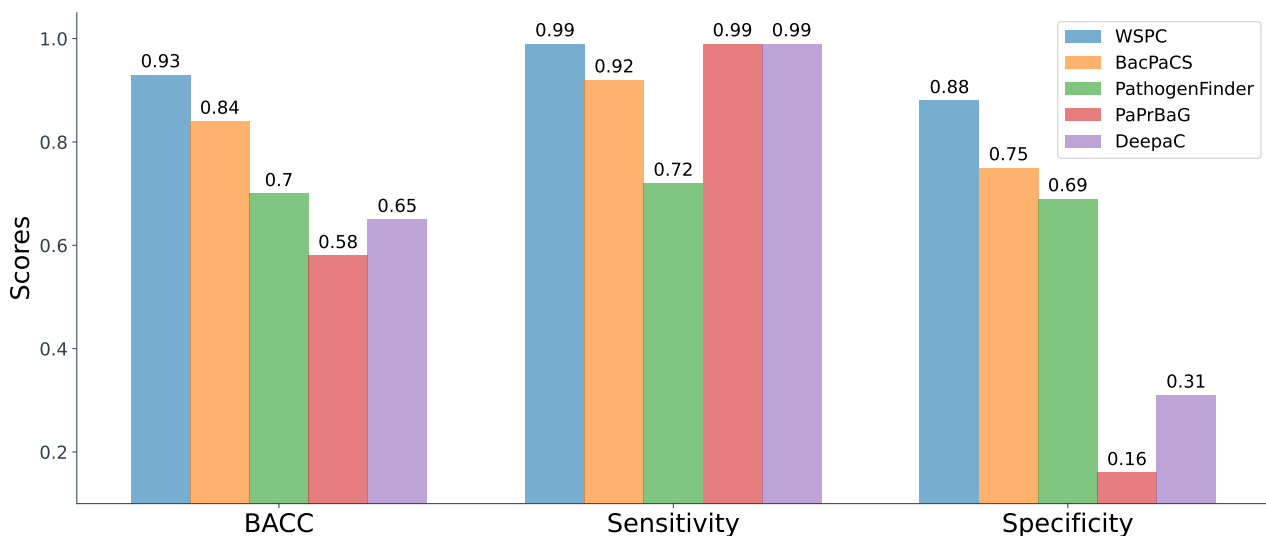

**Figure S2:** Classification performance comparison between WSPC and extant classifiers on 94 out of 100 genomes of the original BacPaCS test set with manually verified labels (Benchmark Test 1, Section 2.2 in the main text).

## S5 Biological Interpretation

### S5.1 A Detailed Description of Each of the Top HP PGFams

As a part of the feature selection process, we performed clustering based on a correlation measure between all pairs of features (i.e., genes), and then selected a PGFam representative from each cluster. Interestingly, 14 out of the 15 PGFams that yielded highest MDI scores in the HP category (Table 1 in the main text), each belong to a “singleton” cluster that contains a single member.

In what follows, we describe the biological function of each of the 15 PGFams in Table 1 from the main text. In addition, we provide a list of PGFams that belong to the same cluster as the PGFam ranked seventh (tRNA-modifying protein YgfZ).

1. Uroporphyrinogen III decarboxylase (EC 4.1.1.37) is an enzyme that catalyzes the fifth step in heme biosynthesis [23]. Heme is essential to the function of hemoproteins, which are involved in processes such as energy generation by the electron transport chain and detoxification of host immune effectors. Both heme acquisition and synthesis are important for pathogenesis [24]. Uroporphyrinogen decarboxylase was found to be important for the survival of *Actinobacillus pleuropneumoniae*, a pathogen swine, during infection [25].

Other PGFams in the corresponding cluster: None.

2. Dihydrolipoamide acetyltransferase (EC 2.3.1.12) is an enzyme component of the multienzyme pyruvate dehydrogenase complex, which has an important role in aerobic respiration pathways [26]. It has been shown that Dihydrolipoamide acyltransferase is critical for *Mycobacterium tuberculosis* pathogenesis [27], and for the colonization of *Vibrio cholerae* [28].

Other PGFams in the corresponding cluster: None.

3. Cytosol aminopeptidase PepA (EC 3.4.11.1). Aminopeptidases are enzymes that catalyze the cleavage of amino acids and are active in several essential cellular processes [29]. PepA transcriptionally regulates the *carB* gene, which plays multiple roles in the pathogenicity of *Xanthomonas citri* [30]. In addition, PepA mediates pH regulation of virulence genes in *Vibrio cholerae* [31].

Other PGFams in the corresponding cluster: None.

4. Protoheme IX farnesyltransferase is an enzyme involved in catalysing the conversion of heme B to heme O, encoded by the gene *ctaB*. Heme O is incorporated into the electron transport chain as an electron acceptor, facilitating aerobic respiration and energy production [32]. The deletion of *ctaB* was observed to cause attenuated growth and virulence of *Staphylococcus aureus* [33], and it was also observed that this gene plays a critical role in the ability of *S. aureus* to secrete cytolytic toxins [34].

Other PGFams in the corresponding cluster: None.

5. Molybdopterin synthase catalytic subunit MoeA (EC 2.8.1.12), is involved in the molybdenum cofactor (MoCo) biosynthetic pathway [35]. Bacteria possess MoCo-dependent enzymes that catalyze redox reactions associated with bacterial respiration and energy conversion processes. These enzymes have been linked to virulence in a variety of bacteria [36]. The prevalence of MoCo-dependent enzymes in key bacterial pathogens, paired with the mounting evidence of their central roles in bacterial fitness during infection, suggest that they could be important future drug targets [37].

Other PGFams in the corresponding cluster: None.

6. Class 2 dihydroorotate dehydrogenase (DHODase) participates in the pyrimidine de novo biosynthesis pathway. The pyrimidine synthetic pathway plays essential roles in the pathogenesis and antibiotic resistance of *P. aeruginosa* and *E. coli*, and in the survival of the pathogen *H. pylori*. Other PGFams in the corresponding cluster: None.
7. Uncharacterized tRNA-modifying protein YgfZ, participates in the synthesis and repair of iron-sulfur (Fe-S) clusters. A mutation in YgfZ causes growth defects in *Escherichia coli*, particularly under oxidative stress, and lowers the activities several Fe-S enzymes [38].  
Other PGFams in the corresponding cluster:  
PGF\_00024322 NAD(P) transhydrogenase subunit beta (EC 1.6.1.2)  
PGF\_00045982 Pyruvate dehydrogenase E1 component (EC 1.2.4.1)  
PGF\_00416576 3'-to-5' oligoribonuclease (orn)  
PGF\_01053024 Glutamine synthetase adenylyl-L-tyrosine phosphorylase (EC 2.7.7.89) / Glutamate-ammonia-ligase adenylyltransferase (EC 2.7.7.42)  
PGF\_03000099 Ribonuclease Y  
PGF\_04792416 LSU ribosomal protein L32p @ LSU ribosomal protein L32p, zinc-independent  
PGF\_05562713 [Protein-PII] uridylyltransferase (EC 2.7.7.59) / [Protein-PII]-UMP uridylyl-removing enzyme  
PGF\_10461681 Ribonuclease E (EC 3.1.26.12)  
PGF\_10525969 Magnesium and cobalt efflux protein CorC
8. 23S rRNA (uracil(1939)-C(5))-methyltransferase (EC 2.1.1.190). Methylation of 23S rRNA was found to provide a significant advantage for bacteria at osmotic and oxidative stress [39].  
Other PGFams in the corresponding cluster: None.
9. YpfJ protein, zinc metalloprotease superfamily, is a protein that cleaves other proteins and uses zinc as a metal cofactor. Metalloproteases play multiple roles in virulence including the disruption of physiologically important host processes, release of nutrients such as metals from host metalloproteins, cleavage of host immune components, and interference with host immune signaling cascades [40].  
Other PGFams in the corresponding cluster: None.
10. Threonine dehydratase biosynthetic (EC 4.3.1.19). Threonine dehydratase mediated isoleucine biosynthesis is an important step in maintaining the metabolic pool of isoleucine, a branch chain amino acid. It has been shown that down-regulation of threonine dehydratase in the pathogen *Mycobacterium tuberculosis* increases its susceptibility to oxidative stress [41]. It also has been suggested that the genes for threonine biosynthesis are critical factors for the multiplication of *Staphylococcus aureus* in the blood [42]. Although *S. aureus* is usually commensal in the skin and the mucosa, its presence in the blood can lead to a bloodstream infection with a high fatality rate [43]. The enzymes belonging to the branch chain amino acid biosynthetic pathway

in bacteria are promising drug targets due to the lack of a similar pathway in mammals, which would reduce related toxicity [44].

Other PGFams in the corresponding cluster: None.

11. The enzyme glutathione reductase (EC 1.8.1.7) is part of the antioxidant glutathione system. Glutathione is an abundant antioxidant in bacteria, where it serves a key function in protecting the cell from the action of low pH, chlorine compounds, osmotic stresses, and reactive oxygen species (ROS) [45]. Glutathione reductase is one of the main enzymes involved in glutathione metabolism [45]. Recent studies suggested that generation of ROS acts as a common mechanism of antibiotics-induced bacterial death, thus inhibiting antioxidant systems such as the glutathione system may limit antibiotic resistance [46].

Other PGFams in the corresponding cluster: None.

12. Cell division integral membrane protein, YggT and half-length relatives. This is an unknown gene with the predicted function of a cell division integral membrane protein, and its gene symbol is YggT. YggT seems to play a role in osmotic stress tolerance in *Escherichia coli* [47]. It has been suggested that osmotic stress responsive systems contribute to the virulence potential of a number of pathogenic bacteria [48].

Other PGFams in the corresponding cluster: None.

13. Superoxide dismutase [Cu-Zn] precursor (EC 1.15.1.1) enzyme. As part of the innate immune response, macrophages and neutrophils attack invading microbes with toxic superoxide [49]. To counteract this attack, some microbial pathogens express Cu, Zn superoxide dismutase enzymes [50]. This enzyme was shown to induce protection against oxidative stress and enhance the pathogenicity of *Bacillus anthracis* [51]. In addition, it was shown to contribute to the resistance of *Mycobacterium tuberculosis* against oxidative burst products generated by macrophages [52].

Other PGFams in the corresponding cluster: None.

14. Sulfur carrier protein FdhD. FdhD is required for formate dehydrogenase to be functional. Formate dehydrogenase was suggested to be involved in oxidative stress tolerance in *E. coli* [53].

Other PGFams in the corresponding cluster: None.

15. Deoxyribodipyrimidine photolyase. Photolyases are enzymes that repair UV-induced DNA lesions by using light energy. Interestingly, many human and plant pathogens contain photolyases [54].

Other PGFams in the corresponding cluster: None.

## S5.2 Top NHP Features

|    | PGFam        | Function                                                                 | MDI (SD <sup>1</sup> ) | HPs | NHPs | P-Ratio <sup>2</sup> | # Genera <sup>3</sup> |
|----|--------------|--------------------------------------------------------------------------|------------------------|-----|------|----------------------|-----------------------|
| 1  | PGF_03029062 | Dihydroorotate dehydrogenase (NAD(+)), catalytic subunit (EC 1.3.1.14)   | 0.034 (0.01)           | 70  | 182  | 5.17                 | 98                    |
| 2  | PGF_01667671 | Cytidylate kinase (EC 2.7.4.25)                                          | 0.031 (0.009)          | 7   | 125  | 31.57                | 60                    |
| 3  | PGF_02930287 | Reverse rubrerythrin                                                     | 0.027 (0.01)           | 11  | 125  | 21.05                | 57                    |
| 4  | PGF_08946513 | Flavodoxin                                                               | 0.021 (0.007)          | 67  | 170  | 5.04                 | 94                    |
| 5  | PGF_01469197 | RNA methyltransferase, TrmA family                                       | 0.021 (0.009)          | 76  | 180  | 4.71                 | 100                   |
| 6  | PGF_01333294 | Activator of (R)-2-hydroxyglutaryl-CoA dehydratase                       | 0.019 (0.007)          | 25  | 128  | 9.95                 | 77                    |
| 7  | PGF_01284176 | Rubrerythrin                                                             | 0.018 (0.009)          | 35  | 142  | 7.96                 | 81                    |
| 8  | PGF_00006245 | Formate-tetrahydrofolate ligase (EC 6.3.4.3)                             | 0.016 (0.007)          | 138 | 201  | 2.91                 | 122                   |
| 9  | PGF_00033940 | Phosphoribosyl-aminoimidazole-carboxamide formyltransferase (EC 2.1.2.3) | 0.016 (0.006)          | 6   | 106  | 30.64                | 53                    |
| 10 | PGF_10332317 | Electron transport complex protein RnfB                                  | 0.014 (0.006)          | 18  | 123  | 13.08                | 62                    |
| 11 | PGF_08126536 | Flavoprotein                                                             | 0.013 (0.006)          | 13  | 114  | 16.47                | 58                    |
| 12 | PGF_00401757 | no significant homology.                                                 | 0.013 (0.006)          | 8   | 106  | 23.83                | 44                    |
| 13 | PGF_00016404 | LSU ribosomal protein L32p @ LSU ribosomal protein L32p, zinc-dependent  | 0.012 (0.005)          | 88  | 173  | 3.92                 | 100                   |
| 14 | PGF_00075770 | FIG00519347: Ribonucleotide reductase-like protein                       | 0.012 (0.003)          | 51  | 135  | 5.24                 | 76                    |
| 15 | PGF_00003251 | Macrolide export ATP-binding/permease protein                            | 0.01 (0.002)           | 16  | 69   | 8.25                 | 40                    |

**Table S1:** The top NHP PGFams that serve as features of the WSPC classifier according to their average Mean Decrease Impurity (MDI) rank, along with the number of HP and NHP genomes in the training set that contain the respective PGFams. The average MDI rank of a PGFam is the average value of the feature’s MDI values computed using 100 random forest classifiers with different random seeds trained on the training set. <sup>1</sup>Standard Deviation. <sup>2</sup>The ratio between the proportion of NHPs with the corresponding PGFam and the proportion of HPs with the corresponding PGFam. To avoid zero division, add-one smoothing was performed. <sup>3</sup> The number of different genera to which the genomes that contain the respective PGFams belong.

## S6 BacPaCS Test Genomes

|    | Genome ID  | Genome Name                                                 | BacPaCS Label <sup>1</sup> | Validated Label <sup>2</sup> | References <sup>3</sup>        | OPP <sup>4</sup> | Balanced Test <sup>5</sup> |
|----|------------|-------------------------------------------------------------|----------------------------|------------------------------|--------------------------------|------------------|----------------------------|
| 1  | 470.3353   | Acinetobacter baumannii strain HWBA8                        | NHP                        | HP                           | Clinical isolate [55]          | [56]             | Yes                        |
| 2  | 106654.48  | Acinetobacter nosocomialis strain SSA3                      | NHP                        | HP                           | Clinical isolate [55]          | [56]             | Yes                        |
| 3  | 520.659    | Bordetella pertussis strain B227                            | HP                         | HP                           | [57]                           |                  | Yes                        |
| 4  | 28450.385  | Burkholderia pseudomallei strain MSHR5864                   | HP                         | HP                           | [58]                           | [59]             | Yes                        |
| 5  | 83554.74   | Chlamydia psittaci strain 2005:CpsCP1                       | HP                         | HP                           | [60]                           |                  | Yes                        |
| 6  | 813.141    | Chlamydia trachomatis strain SQ12                           | HP                         | HP                           | [61]                           |                  | Yes                        |
| 7  | 545.38     | Citrobacter koseri strain FDAAR-GOS.287                     | HP                         | HP                           | [62, 63]                       | [63]             | Yes                        |
| 8  | 777.186    | Coxiella burnetii strain Heizberg                           | HP                         | HP                           | [64]                           |                  | Yes                        |
| 9  | 1352.1760  | Enterococcus faecium strain Ef_aus00233                     | NHP                        | HP                           | Hospital outbreak isolate [65] | [66]             | Yes                        |
| 10 | 562.22306  | Escherichia coli strain FDAAR-GOS.433 strain Not applicable | HP                         | HP                           | [67]                           |                  | Yes                        |
| 11 | 210.2912   | Helicobacter pylori strain F20                              | HP                         | HP                           | [68]                           |                  | Yes                        |
| 12 | 573.16474  | Klebsiella pneumoniae strain KP9                            | HP                         | HP                           | [69, 70]                       | [70]             | Yes                        |
| 13 | 1639.2624  | Listeria monocytogenes strain H34                           | HP                         | HP                           | [71]                           | [71]             | Yes                        |
| 14 | 1041522.28 | Mycobacterium colombiense strain CECT 3035                  | HP                         | HP                           | [72]                           | [72]             | Yes                        |
| 15 | 722731.3   | Mycobacterium shigaense strain UN-152                       | HP                         | HP                           | [73]                           | [74]             | Yes                        |
| 16 | 1773.8714  | Mycobacterium tuberculosis strain MDRMA2441                 | HP                         | HP                           | [75]                           |                  | Yes                        |
| 17 | 2104.190   | Mycoplasma pneumoniae strain KCH-405                        | HP                         | HP                           | [76]                           |                  | Yes                        |
| 18 | 37326.9    | Nocardia brasiliensis strain FDAARGOS.352                   | HP                         | HP                           | [77, 78]                       |                  | Yes                        |
| 19 | 28131.10   | Prevotella intermedia strain OMA14                          | HP                         | HP                           | [79]                           | [80]             | Yes                        |
| 20 | 287.4623   | Pseudomonas aeruginosa strain PB350                         | HP                         | HP                           | [81]                           | [82]             | Yes                        |
| 21 | 1280.11681 | Staphylococcus aureus strain USA300-SUR15                   | HP                         | HP                           | [83]                           | [84]             | Yes                        |
| 22 | 1302.83    | Streptococcus gordonii strain FDAARGOS_257                  | HP                         | HP                           | [85, 86]                       | [86]             | Yes                        |
| 23 | 1338.30    | Streptococcus intermedius strain FDAARGOS_233               | HP                         | HP                           | [87]                           | [87]             | Yes                        |
| 24 | 1902136.3  | Streptococcus sp. NPS 308                                   | NHP                        | HP                           | Clinical isolate [88]          | [88]             | Yes                        |
| 25 | 730.54     | [Haemophilus] ducreyi strain FDAARGOS_297                   | HP                         | HP                           | [89, 90]                       |                  | Yes                        |
| 26 | 28025.19   | Bifidobacterium animalis strain BL3                         | NHP                        | NHP                          | [91]                           |                  | Yes                        |
| 27 | 1496.1556  | Clostridioides difficile strain BR81                        | NHP                        | NHP                          | [92, 93]                       | [93]             | Yes                        |
| 28 | 74426.49   | Collinsella aerofaciens strain indica                       | NHP                        | NHP                          | [94]                           | [95]             | Yes                        |
| 29 | 853.172    | Faecalibacterium prausnitzii strain Indica                  | NHP                        | NHP                          | [96]                           |                  | Yes                        |
| 30 | 1841863.3  | Gordonibacter sp. Marseille-P2775 strain Marseille-P2775    | NHP                        | NHP                          | [97]                           |                  | Yes                        |
| 31 | 1582.99    | Lactobacillus casei strain LC5                              | NHP                        | NHP                          | [98]                           |                  | Yes                        |
| 32 | 1613.133   | Lactobacillus fermentum strain FTDC 8312                    | NHP                        | NHP                          | [99]                           |                  | Yes                        |
| 33 | 1590.548   | Lactobacillus plantarum strain LP3                          | NHP                        | NHP                          | [100]                          |                  | Yes                        |
| 34 | 47715.277  | Lactobacillus rhamnosus strain Pen                          | NHP                        | NHP                          | [101]                          |                  | Yes                        |

Continued on next page

|    | Genome ID | Genome Name                                               | BacPaCS Label <sup>1</sup> | Validated Label <sup>2</sup> | References <sup>3</sup>                | OPP <sup>4</sup> | Balanced Test <sup>5</sup> |
|----|-----------|-----------------------------------------------------------|----------------------------|------------------------------|----------------------------------------|------------------|----------------------------|
| 35 | 487.1231  | <i>Neisseria meningitidis</i> strain 38277                | NHP                        | NHP                          | [102]                                  |                  | Yes                        |
| 36 | 1944646.3 | <i>Phoenicibacter massiliensis</i> strain Marseille-P3241 | NHP                        | NHP                          | [103]                                  |                  | Yes                        |
| 37 | 1849491.6 | Staphylococcaceae bacterium S31 strain S31                | NHP                        | NHP                          | [104]                                  |                  | Yes                        |
| 38 | 1308.247  | <i>Streptococcus thermophilus</i> strain ST3              | NHP                        | NHP                          | [105]                                  |                  | Yes                        |
| 39 | 137591.34 | <i>Weissella cibaria</i> strain CMS3                      | NHP                        | NHP                          | [106]                                  |                  | Yes                        |
| 40 | 515619.32 | [ <i>Eubacterium rectale</i> ] ATCC 33656                 | NHP                        | NHP                          | [107]                                  |                  | Yes                        |
| 41 | 470.3349  | <i>Acinetobacter baumannii</i> strain 15A34               | NHP                        | HP                           | Clinical isolate [55]                  |                  | No                         |
| 42 | 470.3350  | <i>Acinetobacter baumannii</i> strain 15A5                | NHP                        | HP                           | Clinical isolate [55]                  |                  | No                         |
| 43 | 470.3348  | <i>Acinetobacter baumannii</i> strain CBA7                | NHP                        | HP                           | Clinical isolate [55]                  |                  | No                         |
| 44 | 470.3347  | <i>Acinetobacter baumannii</i> strain JBA13               | NHP                        | HP                           | Clinical isolate [55]                  |                  | No                         |
| 45 | 470.3356  | <i>Acinetobacter baumannii</i> strain SAA14               | NHP                        | HP                           | Clinical isolate [55]                  |                  | No                         |
| 46 | 470.3357  | <i>Acinetobacter baumannii</i> strain SSA12               | NHP                        | HP                           | Clinical isolate [55]                  |                  | No                         |
| 47 | 470.3352  | <i>Acinetobacter baumannii</i> strain SSA6                | NHP                        | HP                           | Clinical isolate [55]                  |                  | No                         |
| 48 | 470.3358  | <i>Acinetobacter baumannii</i> strain SSMA17              | NHP                        | HP                           | Clinical isolate [55]                  |                  | No                         |
| 49 | 470.3355  | <i>Acinetobacter baumannii</i> strain USA15               | NHP                        | HP                           | Clinical isolate [55]                  |                  | No                         |
| 50 | 470.3351  | <i>Acinetobacter baumannii</i> strain USA2                | NHP                        | HP                           | Clinical isolate [55]                  |                  | No                         |
| 51 | 470.3354  | <i>Acinetobacter baumannii</i> strain WKA02               | NHP                        | HP                           | Clinical isolate [55]                  |                  | No                         |
| 52 | 520.747   | <i>Bordetella pertussis</i> strain C934                   | HP                         | HP                           | [57]                                   |                  | No                         |
| 53 | 520.694   | <i>Bordetella pertussis</i> strain H361                   | HP                         | HP                           | [57]                                   |                  | No                         |
| 54 | 520.667   | <i>Bordetella pertussis</i> strain H698                   | HP                         | HP                           | [57]                                   |                  | No                         |
| 55 | 520.529   | <i>Bordetella pertussis</i> strain H754                   | HP                         | HP                           | [57]                                   |                  | No                         |
| 56 | 520.670   | <i>Bordetella pertussis</i> strain H771                   | HP                         | HP                           | [57]                                   |                  | No                         |
| 57 | 520.535   | <i>Bordetella pertussis</i> strain H812                   | HP                         | HP                           | [57]                                   |                  | No                         |
| 58 | 520.698   | <i>Bordetella pertussis</i> strain H876                   | HP                         | HP                           | [57]                                   |                  | No                         |
| 59 | 520.699   | <i>Bordetella pertussis</i> strain I093                   | HP                         | HP                           | [57]                                   |                  | No                         |
| 60 | 520.572   | <i>Bordetella pertussis</i> strain I112                   | HP                         | HP                           | [57]                                   |                  | No                         |
| 61 | 520.537   | <i>Bordetella pertussis</i> strain I238                   | HP                         | HP                           | [57]                                   |                  | No                         |
| 62 | 520.629   | <i>Bordetella pertussis</i> strain I461                   | HP                         | HP                           | [57]                                   |                  | No                         |
| 63 | 520.543   | <i>Bordetella pertussis</i> strain I763                   | HP                         | HP                           | [57]                                   |                  | No                         |
| 64 | 520.574   | <i>Bordetella pertussis</i> strain I998                   | HP                         | HP                           | [57]                                   |                  | No                         |
| 65 | 520.546   | <i>Bordetella pertussis</i> strain J018                   | HP                         | HP                           | [57]                                   |                  | No                         |
| 66 | 520.650   | <i>Bordetella pertussis</i> strain J073                   | HP                         | HP                           | [57]                                   |                  | No                         |
| 67 | 520.737   | <i>Bordetella pertussis</i> strain J078                   | HP                         | HP                           | [57]                                   |                  | No                         |
| 68 | 520.708   | <i>Bordetella pertussis</i> strain J122                   | HP                         | HP                           | [57]                                   |                  | No                         |
| 69 | 520.671   | <i>Bordetella pertussis</i> strain J178                   | HP                         | HP                           | [57]                                   |                  | No                         |
| 70 | 520.672   | <i>Bordetella pertussis</i> strain J179                   | HP                         | HP                           | [57]                                   |                  | No                         |
| 71 | 520.678   | <i>Bordetella pertussis</i> strain J194                   | HP                         | HP                           | [57]                                   |                  | No                         |
| 72 | 520.680   | <i>Bordetella pertussis</i> strain J296                   | HP                         | HP                           | [57]                                   |                  | No                         |
| 73 | 28450.655 | <i>Burkholderia pseudomallei</i> strain 2010007509        | HP                         | HP                           | [108, 59]                              | [59]             | No                         |
| 74 | 813.142   | <i>Chlamydia trachomatis</i> strain SQ14                  | HP                         | HP                           | [61]                                   |                  | No                         |
| 75 | 168807.6  | <i>Escherichia coli</i> O127:H6 strain EPEC1              | NHP                        | HP                           | Pathogenic <i>E. coli</i> strain [109] |                  | No                         |
| 76 | 562.16466 | <i>Escherichia coli</i> strain 5CRE51                     | HP                         | HP                           | [110]                                  |                  | No                         |
| 77 | 562.22333 | <i>Escherichia coli</i> strain ATCC 43896                 | HP                         | HP                           | [111]                                  |                  | No                         |

Continued on next page

|     | Genome ID  | Genome Name                                                     | BacPaCS Label <sup>1</sup> | Validated Label <sup>2</sup> | References <sup>3</sup>                | OPP <sup>4</sup> | Balanced Test <sup>5</sup> |
|-----|------------|-----------------------------------------------------------------|----------------------------|------------------------------|----------------------------------------|------------------|----------------------------|
| 78  | 562.15193  | Escherichia coli strain Ecol.276                                | HP                         | HP                           | [112]                                  |                  | No                         |
| 79  | 562.22323  | Escherichia coli strain FDAAR-GOS.434 strain Not applicable     | HP                         | HP                           | [113]                                  |                  | No                         |
| 80  | 562.22307  | Escherichia coli strain FDAAR-GOS.448 strain Not applicable     | HP                         | HP                           | [114]                                  |                  | No                         |
| 81  | 562.16428  | Escherichia coli strain G199                                    | NHP                        | HP                           | Pathogenic <i>E. coli</i> strain [115] |                  | No                         |
| 82  | 562.22326  | Escherichia coli strain UFU_EC98                                | HP                         | HP                           | [116]                                  |                  | No                         |
| 83  | 573.16440  | Klebsiella pneumoniae strain 459                                | HP                         | HP                           | [117]                                  | [70]             | No                         |
| 84  | 573.15319  | Klebsiella pneumoniae strain FDAARGOS_436 strain Not applicable | HP                         | HP                           | [118]                                  | [70]             | No                         |
| 85  | 1196172.3  | Listeria monocytogenes serotype 4b str. 02-1289 strain 02-1289  | HP                         | HP                           | [119, 71]                              | [71]             | No                         |
| 86  | 1196162.3  | Listeria monocytogenes serotype 4b str. 10-0809 strain 10-0809  | HP                         | HP                           | [120, 71]                              | [71]             | No                         |
| 87  | 1773.8686  | Mycobacterium tuberculosis strain LE13                          | HP                         | HP                           | [75]                                   |                  | No                         |
| 88  | 1773.8719  | Mycobacterium tuberculosis strain TBDM2489                      | HP                         | HP                           | [75]                                   |                  | No                         |
| 89  | 2104.189   | Mycoplasma pneumoniae strain KCH-402                            | HP                         | HP                           | [76]                                   |                  | No                         |
| 90  | 487.1548   | Neisseria meningitidis strain M26417                            | HP                         | HP                           | [121]                                  | [102]            | No                         |
| 91  | 287.3868   | Pseudomonas aeruginosa strain RIVM-EMC2982                      | NHP                        | HP                           | Clinical isolate [122]                 | [82]             | No                         |
| 92  | 1280.12234 | Staphylococcus aureus strain JE2                                | HP                         | HP                           | [123, 84]                              | [84]             | No                         |
| 93  | 1280.11677 | Staphylococcus aureus strain USA300-SUR11                       | HP                         | HP                           | [124, 84]                              | [84]             | No                         |
| 94  | 76857.43   | Fusobacterium nucleatum subsp. polymorphum strain KCOM 1275     | NHP                        | INC                          | [12]                                   |                  | No                         |
| 95  | 172042.4   | Rothia aeria strain JCM 11412                                   | NHP                        | INC                          |                                        | [14]             | No                         |
| 96  | 860.11     | Fusobacterium periodonticum strain KCOM 1261                    | NHP                        | INC                          | [125]                                  |                  | No                         |
| 97  | 860.17     | Fusobacterium periodonticum strain KCOM 1262                    | NHP                        | INC                          | [125]                                  |                  | No                         |
| 98  | 860.16     | Fusobacterium periodonticum strain KCOM 2555                    | NHP                        | INC                          | [125]                                  |                  | No                         |
| 99  | 860.18     | Fusobacterium periodonticum strain KCOM 2653                    | NHP                        | INC                          | [125]                                  |                  | No                         |
| 100 | 47715.310  | Lactobacillus rhamnosus strain LR5                              | NHP                        | NHP                          | [126]                                  |                  | No                         |

**Table S2:** A list of genomes included in the BacPaCS test set. <sup>1</sup>The original label given to each genome by Barash *et al.* [7]. <sup>2,3</sup>Manually validated label according to the PATRIC metadata entry and according to the literature, along with the respective reference. INC stands for an inconclusive label, see text. <sup>4</sup>A reference is provided if the corresponding species is known to cause opportunistic infections. <sup>5</sup>Whether the genome is part of the balanced version of the BacPaCS test, which includes one genomes per species.

## S7 WSPC Test Genomes

|   | Genome ID | Genome Name                             | Label | HP/NHP <sup>1</sup> | Species                 | References <sup>2</sup> | OPP <sup>3</sup> |
|---|-----------|-----------------------------------------|-------|---------------------|-------------------------|-------------------------|------------------|
| 1 | 163603.4  | Actinomadura latina strain ATCC BAA-277 | HP    | 1/0                 | Actinomadura latina     | [127]                   | No               |
| 2 | 648.157   | Aeromonas caviae strain ScAc2001        | HP    | 9/0                 | Aeromonas caviae        | [128]                   | No               |
| 3 | 565.15    | Atlantibacter hermannii strain 3608     | HP    | 1/0                 | Atlantibacter hermannii | [129]                   | No               |

Continued on next page



|    | Genome ID  | Genome Name                                                                          | Label | HP/NHP <sup>1</sup> | Species                                              | References <sup>2</sup> | OPP. <sup>3</sup> |
|----|------------|--------------------------------------------------------------------------------------|-------|---------------------|------------------------------------------------------|-------------------------|-------------------|
| 4  | 29459.655  | <i>Brucella melitensis</i> strain HN20190002                                         | HP    | 13/0                | <i>Brucella melitensis</i>                           | [130]                   | No                |
| 5  | 87883.284  | <i>Burkholderia multivorans</i> strain C1576                                         | HP    | 107/0               | <i>Burkholderia multivorans</i>                      | [131]                   | No                |
| 6  | 195.2778   | <i>Campylobacter coli</i> strain 202823                                              | HP    | 95/0                | <i>Campylobacter coli</i>                            | [132, 133]              | No                |
| 7  | 201.69     | <i>Campylobacter lari</i> strain 503734                                              | HP    | 3/0                 | <i>Campylobacter lari</i>                            | [134, 135]              | No                |
| 8  | 2572066.4  | <i>Campylobacter</i> sp. CFSAN093243                                                 | HP    | 194/0               | <i>Campylobacter jejuni</i>                          | [134, 136, 137]         | No                |
| 9  | 1491.1756  | <i>Clostridium botulinum</i> strain ZBS3_16-240-01                                   | HP    | 7/0                 | <i>Clostridium botulinum</i>                         | [138]                   | No                |
| 10 | 65058.433  | <i>Corynebacterium ulcerans</i> strain 02-13                                         | HP    | 8/0                 | <i>Corynebacterium ulcerans</i>                      | [139]                   | No                |
| 11 | 208962.153 | <i>Escherichia albertii</i> strain 13S38                                             | HP    | 34/0                | <i>Escherichia albertii</i>                          | [140]                   | No                |
| 12 | 562.55247  | <i>Escherichia coli</i> strain 4374                                                  | HP    | 4352/396            | <i>Escherichia coli</i>                              | [141]                   | No                |
| 13 | 210.6620   | <i>Helicobacter pylori</i> strain MHP47                                              | HP    | 526/0               | <i>Helicobacter pylori</i>                           | [142]                   | No                |
| 14 | 104628.50  | <i>Helicobacter suis</i> strain NHP19-4022                                           | HP    | 2/0                 | <i>Helicobacter suis</i>                             | [143]                   | No                |
| 15 | 44275.61   | <i>Leptospira interrogans</i> serovar Copenhageni strain CLEP00179                   | HP    | 6/0                 | <i>Leptospira interrogans</i>                        | [144]                   | No                |
| 16 | 1639.7756  | <i>Listeria monocytogenes</i> strain SCPM-O-B-7909                                   | HP    | 197/0               | <i>Listeria monocytogenes</i>                        | [145]                   | No                |
| 17 | 78331.108  | <i>Mycobacterium canettii</i> strain NLA000701671                                    | HP    | 1/0                 | <i>Mycobacterium canettii</i>                        | [146]                   | No                |
| 18 | 1768.199   | <i>Mycobacterium kansasii</i> strain JALMAMYKAN-1                                    | HP    | 34/0                | <i>Mycobacterium kansasii</i>                        | [147]                   | No                |
| 19 | 2664891.3  | <i>Mycobacterium tuberculosis</i> complex sp. AY1MRC                                 | HP    | 1/0                 | <i>Mycobacterium tuberculosis</i> complex sp. AY1MRC | [148]                   | No                |
| 20 | 1773.20690 | <i>Mycobacterium tuberculosis</i> strain <i>Mycobacterium tuberculosis</i> 79499     | HP    | 3445/2              | <i>Mycobacterium tuberculosis</i>                    | [149]                   | No                |
| 21 | 485.8128   | <i>Neisseria gonorrhoeae</i> strain 5671 strain not applicable                       | HP    | 289/0               | <i>Neisseria gonorrhoeae</i>                         | [150]                   | No                |
| 22 | 90370.3046 | <i>Salmonella enterica</i> subsp. <i>enterica</i> serovar Typhi strain 343077_206161 | HP    | 1480/2              | <i>Salmonella enterica</i>                           | [151]                   | No                |
| 23 | 624.2242   | <i>Shigella sonnei</i> strain 7109.28                                                | HP    | 850/0               | <i>Shigella sonnei</i>                               | [152]                   | No                |
| 24 | 686.65     | <i>Vibrio cholerae</i> O1 biovar El Tor strain NALMLE37                              | HP    | 344/0               | <i>Vibrio cholerae</i>                               | [153]                   | No                |
| 25 | 150053.31  | <i>Yersinia enterocolitica</i> subsp. <i>palaearctica</i> strain Ye9N                | HP    | 5/0                 | <i>Yersinia enterocolitica</i>                       | [154]                   | No                |
| 26 | 85698.208  | <i>Achromobacter xylosoxidans</i> strain DN2019                                      | HP    | 16/0                | <i>Achromobacter xylosoxidans</i>                    | [155]                   | Yes               |
| 27 | 470.9648   | <i>Acinetobacter baumannii</i> strain KT_2016_39                                     | HP    | 2281/0              | <i>Acinetobacter baumannii</i>                       | [156]                   | Yes               |
| 28 | 29430.96   | <i>Acinetobacter haemolyticus</i> strain 11654                                       | HP    | 25/0                | <i>Acinetobacter haemolyticus</i>                    | [157]                   | Yes               |
| 29 | 28090.110  | <i>Acinetobacter lwoffii</i> strain FDAARGOS_620 strain Not applicable               | HP    | 2/0                 | <i>Acinetobacter lwoffii</i>                         | [158]                   | Yes               |
| 30 | 48296.376  | <i>Acinetobacter pittii</i> strain VNMU 150                                          | HP    | 43/2                | <i>Acinetobacter pittii</i>                          | [159]                   | Yes               |
| 31 | 2026190.21 | <i>Bacillus mobilis</i> strain 1428.155                                              | HP    | 1/0                 | <i>Bacillus mobilis</i>                              | [160, 161]              | Yes               |
| 32 | 2026186.33 | <i>Bacillus paranthracis</i> strain ELWA-3-3298                                      | HP    | 1/1                 | <i>Bacillus paranthracis</i>                         | [162]                   | Yes               |
| 33 | 817.1653   | <i>Bacteroides fragilis</i> strain PP971                                             | HP    | 61/45               | <i>Bacteroides fragilis</i>                          | [163]                   | Yes               |

Continued on next page

|    | Genome ID   | Genome Name                                       | Label | HP/NHP <sup>1</sup> | Species                        | References <sup>2</sup> | OPP. <sup>3</sup> |
|----|-------------|---------------------------------------------------|-------|---------------------|--------------------------------|-------------------------|-------------------|
| 34 | 95486.460   | Burkholderia cenocepacia strain MS-2140           | HP    | 206/0               | Burkholderia cenocepacia       | [164]                   | Yes               |
| 35 | 292.237     | Burkholderia cepacia strain IST612                | HP    | 3/0                 | Burkholderia cepacia           | [165]                   | Yes               |
| 36 | 28450.2018  | Burkholderia pseudomallei strain haikou8          | HP    | 168/0               | Burkholderia pseudomallei      | [59]                    | Yes               |
| 37 | 1507806.57  | Campylobacter fetus subsp. testudinum strain wqj4 | HP    | 14/0                | Campylobacter fetus            | [166]                   | Yes               |
| 38 | 57706.80    | Citrobacter braakii strain CB00017                | HP    | 1/0                 | Citrobacter braakii            | [167]                   | Yes               |
| 39 | 67824.24    | Citrobacter farmeri strain YDC697-2               | HP    | 1/0                 | Citrobacter farmeri            | [63, 168]               | Yes               |
| 40 | 546.797     | Citrobacter freundii strain YDC638-3              | HP    | 34/1                | Citrobacter freundii           | [63]                    | Yes               |
| 41 | 545.121     | Citrobacter koseri strain AS012499                | HP    | 7/1                 | Citrobacter koseri             | [63]                    | Yes               |
| 42 | 67827.42    | Citrobacter werkmanii strain YDC667-1             | HP    | 4/0                 | Citrobacter werkmanii          | [63]                    | Yes               |
| 43 | 133448.15   | Citrobacter youngae strain AS012330               | HP    | 1/0                 | Citrobacter youngae            | [63]                    | Yes               |
| 44 | 1496.5104   | Clostridioides difficile strain TMD0138           | HP    | 601/39              | Clostridioides difficile       | [93, 169]               | Yes               |
| 45 | 413503.68   | Cronobacter malonaticus strain BJ15               | HP    | 8/0                 | Cronobacter malonaticus        | [170]                   | Yes               |
| 46 | 413501.15   | Cronobacter muytjensii strain Cr150               | HP    | 1/0                 | Cronobacter muytjensii         | [170]                   | Yes               |
| 47 | 28141.803   | Cronobacter sakazakii strain SD45                 | HP    | 47/0                | Cronobacter sakazakii          | [170]                   | Yes               |
| 48 | 413502.35   | Cronobacter turicensis strain SH11                | HP    | 2/0                 | Cronobacter turicensis         | [170]                   | Yes               |
| 49 | 539.170     | Eikenella corrodens strain EL_09                  | HP    | 8/0                 | Eikenella corrodens            | [171, 172]              | Yes               |
| 50 | 2528037.4   | Eikenella exigua strain EL_02                     | HP    | 1/0                 | Eikenella exigua               | [171, 173]              | Yes               |
| 51 | 1117645.412 | Elizabethkingia anophelis strain PHOL-515         | HP    | 11/0                | Elizabethkingia anophelis      | [174]                   | Yes               |
| 52 | 238.101     | Elizabethkingia meningoseptica strain GX196       | HP    | 6/0                 | Elizabethkingia meningoseptica | [174]                   | Yes               |
| 53 | 61645.317   | Enterobacter asburiae strain TUM17941             | HP    | 20/0                | Enterobacter asburiae          | [175]                   | Yes               |
| 54 | 2494701.5   | Enterobacter chengduensis strain C2-143-1         | HP    | 2/0                 | Enterobacter chengduensis      | [176]                   | Yes               |
| 55 | 550.2644    | Enterobacter cloacae strain AS012445              | HP    | 119/1               | Enterobacter cloacae           | [176]                   | Yes               |
| 56 | 299767.100  | Enterobacter ludwigii strain AS012471             | HP    | 6/0                 | Enterobacter ludwigii          | [175]                   | Yes               |
| 57 | 1812935.59  | Enterobacter roggenkampii strain AS012293         | HP    | 12/0                | Enterobacter roggenkampii      | [177]                   | Yes               |
| 58 | 1351.3480   | Enterococcus faecalis strain VNMU281              | HP    | 98/13               | Enterococcus faecalis          | [178, 179]              | Yes               |
| 59 | 1353.134    | Enterococcus gallinarum strain EGR748             | HP    | 2/1                 | Enterococcus gallinarum        | [180, 181]              | Yes               |
| 60 | 727.2505    | Haemophilus influenzae strain AS012767            | HP    | 409/0               | Haemophilus influenzae         | [182]                   | Yes               |
| 61 | 729.1932    | Haemophilus parainfluenzae strain COPD-014-E1 O   | HP    | 3/0                 | Haemophilus parainfluenzae     | [183]                   | Yes               |
| 62 | 548.678     | Klebsiella aerogenes strain AS012329              | HP    | 96/0                | Klebsiella aerogenes           | [184]                   | Yes               |
| 63 | 1134687.181 | Klebsiella michiganensis strain AS012446          | HP    | 13/0                | Klebsiella michiganensis       | [185]                   | Yes               |
| 64 | 571.798     | Klebsiella oxytoca strain AS012479                | HP    | 28/0                | Klebsiella oxytoca             | [186]                   | Yes               |
| 65 | 573.29103   | Klebsiella pneumoniae strain ST974-OXA48          | HP    | 3859/8              | Klebsiella pneumoniae          | [186]                   | Yes               |

Continued on next page

|    | Genome ID   | Genome Name                                                  | Label | HP/NHP <sup>1</sup> | Species                        | References <sup>2</sup> | OPP. <sup>3</sup> |
|----|-------------|--------------------------------------------------------------|-------|---------------------|--------------------------------|-------------------------|-------------------|
| 66 | 1463165.235 | Klebsiella quasipneumoniae strain M36                        | HP    | 67/0                | Klebsiella quasipneumoniae     | [187]                   | Yes               |
| 67 | 244366.462  | Klebsiella variicola strain AS012291                         | HP    | 129/0               | Klebsiella variicola           | [187]                   | Yes               |
| 68 | 109328.8    | Leptotrichia trevisanii strain JMUB3870                      | HP    | 1/0                 | Leptotrichia trevisanii        | [188]                   | Yes               |
| 69 | 480.450     | Moraxella catarrhalis strain AS012766                        | HP    | 64/0                | Moraxella catarrhalis          | [189]                   | Yes               |
| 70 | 582.399     | Morganella morganii strain AS012332                          | HP    | 18/0                | Morganella morganii            | [190]                   | Yes               |
| 71 | 1809.19     | Mycobacterium ulcerans strain CSURQ0185                      | HP    | 3/0                 | Mycobacterium ulcerans         | [191]                   | Yes               |
| 72 | 36809.633   | Mycobacteroides abscessus strain 1322-S0                     | HP    | 682/0               | Mycobacteroides abscessus      | [192]                   | Yes               |
| 73 | 948102.18   | Mycobacteroides franklinii strain 9917                       | HP    | 1/0                 | Mycobacteroides franklinii     | [193]                   | Yes               |
| 74 | 487.3238    | Neisseria meningitidis strain N186_00                        | HP    | 278/43              | Neisseria meningitidis         | [102]                   | Yes               |
| 75 | 455432.12   | Nocardia terpenica strain IFM 0706                           | HP    | 1/0                 | Nocardia terpenica             | [194, 195]              | Yes               |
| 76 | 419475.21   | Ochrobactrum pseudogrignonense strain SHIN                   | HP    | 1/0                 | Ochrobactrum pseudogrignonense | [196, 197]              | Yes               |
| 77 | 1202713.3   | Paenaltcaligenes suwonensis strain 191B                      | HP    | 1/0                 | Paenaltcaligenes suwonensis    | [198]                   | Yes               |
| 78 | 44250.11    | Paenibacillus alvei strain bk032014                          | HP    | 1/0                 | Paenibacillus alvei            | [199]                   | Yes               |
| 79 | 753.7       | Pasteurella canis strain QBSD                                | HP    | 1/0                 | Pasteurella canis              | [200]                   | Yes               |
| 80 | 584.1255    | Proteus mirabilis strain L76                                 | HP    | 68/2                | Proteus mirabilis              | [201]                   | Yes               |
| 81 | 585.92      | Proteus vulgaris strain AS012427                             | HP    | 2/0                 | Proteus vulgaris               | [202]                   | Yes               |
| 82 | 588.149     | Providencia stuartii strain AS012498                         | HP    | 7/0                 | Providencia stuartii           | [203]                   | Yes               |
| 83 | 287.11178   | Pseudomonas aeruginosa strain PASP309                        | HP    | 1957/0              | Pseudomonas aeruginosa         | [204]                   | Yes               |
| 84 | 46680.55    | Pseudomonas nitroreducens strain SC-1148-IPA-05              | HP    | 1/0                 | Pseudomonas nitroreducens      | [204, 205]              | Yes               |
| 85 | 2681497.3   | Pseudomonas sp. AU8050                                       | HP    | 32/0                | unclassified Pseudomonas       | [206, 207]              | Yes               |
| 86 | 190721.31   | Ralstonia insidiosa strain 5047 strain not applicable        | HP    | 1/0                 | Ralstonia insidiosa            | [208]                   | Yes               |
| 87 | 54291.261   | Raoultella ornithinolytica strain Z&Z370                     | HP    | 10/0                | Raoultella ornithinolytica     | [209]                   | Yes               |
| 88 | 575.68      | Raoultella planticola strain AS012264                        | HP    | 5/0                 | Raoultella planticola          | [210]                   | Yes               |
| 89 | 648995.31   | Rhizobium pusense strain FDAAR-GOS.618 strain Not applicable | HP    | 3/0                 | Rhizobium pusense              | [211]                   | Yes               |
| 90 | 615.1093    | Serratia marcescens strain C3                                | HP    | 137/0               | Serratia marcescens            | [212]                   | Yes               |
| 91 | 29378.48    | Staphylococcus arlettae strain N283                          | HP    | 2/0                 | Staphylococcus arlettae        | [213]                   | Yes               |
| 92 | 1280.23630  | Staphylococcus aureus strain SA15KEN strain not applicable   | HP    | 2605/61             | Staphylococcus aureus          | [214, 215]              | Yes               |
| 93 | 29388.243   | Staphylococcus capitis strain 12-400                         | HP    | 29/1                | Staphylococcus capitis         | [216]                   | Yes               |
| 94 | 1283.793    | Staphylococcus haemolyticus strain 166 strain not applicable | HP    | 131/0               | Staphylococcus haemolyticus    | [217]                   | Yes               |
| 95 | 2045451.27  | Stenotrophomonas indicatrix strain AS012656                  | HP    | 1/0                 | Stenotrophomonas indicatrix    | [218, 219]              | Yes               |
| 96 | 40324.1544  | Stenotrophomonas maltophilia strain AS012600                 | HP    | 216/1               | Stenotrophomonas maltophilia   | [220]                   | Yes               |
| 97 | 119602.327  | Streptococcus dysgalactiae subsp. equisimilis strain KNZ15   | HP    | 15/0                | Streptococcus dysgalactiae     | [221]                   | Yes               |
| 98 | 254785.37   | Streptococcus halichoeri strain CCUG67100                    | HP    | 1/0                 | Streptococcus halichoeri       | [222]                   | Yes               |

Continued on next page

|     | Genome ID   | Genome Name                                            |  | Label | HP/NHP <sup>1</sup> | Species                        | References <sup>2</sup> | OPP. <sup>3</sup> |
|-----|-------------|--------------------------------------------------------|--|-------|---------------------|--------------------------------|-------------------------|-------------------|
| 99  | 1313.20171  | Streptococcus pneumoniae strain GPSC334                |  | HP    | 4748/235            | Streptococcus pneumoniae       | [223, 224]              | Yes               |
| 100 | 257758.659  | Streptococcus pseudopneumoniae strain CCUG 72018       |  | HP    | 40/0                | Streptococcus pseudopneumoniae | [225]                   | Yes               |
| 101 | 1343.51     | Streptococcus vestibularis strain AS012761             |  | HP    | 1/1                 | Streptococcus vestibularis     | [226, 227]              | Yes               |
| 102 | 40545.1254  | Sutterella wadsworthensis strain 809h                  |  | HP    | 20/0                | Sutterella wadsworthensis      | [228, 229]              | Yes               |
| 103 | 1648923.136 | Bacillus paralicheniformis strain 6-1                  |  | NHP   | 0/2                 | Bacillus paralicheniformis     | [230, 231]              | No                |
| 104 | 1423.1028   | Bacillus subtilis strain 8-1                           |  | NHP   | 0/3                 | Bacillus subtilis              | [232, 233]              | No                |
| 105 | 492670.508  | Bacillus velezensis strain Marseille-Q1230             |  | NHP   | 0/1                 | Bacillus velezensis            | [234, 235]              | No                |
| 106 | 28116.1355  | Bacteroides ovatus strain F11                          |  | NHP   | 2/28                | Bacteroides ovatus             | [236, 237]              | No                |
| 107 | 820.4961    | Bacteroides uniformis strain A23                       |  | NHP   | 2/46                | Bacteroides uniformis          | [238, 239]              | No                |
| 108 | 371601.509  | Bacteroides xylanisolvens strain BIOML-A67             |  | NHP   | 0/11                | Bacteroides xylanisolvens      | [240, 241]              | No                |
| 109 | 1680.1978   | Bifidobacterium adolescentis strain BIO5485            |  | NHP   | 0/24                | Bifidobacterium adolescentis   | [242]                   | No                |
| 110 | 28025.139   | Bifidobacterium animalis strain BIOML-A2               |  | NHP   | 0/6                 | Bifidobacterium animalis       | [240, 243]              | No                |
| 111 | 1681.836    | Bifidobacterium bifidum strain BIOML-A20               |  | NHP   | 0/33                | Bifidobacterium bifidum        | [240, 244]              | No                |
| 112 | 1689.110    | Bifidobacterium dentium strain UT_Austin_Bifido_FMT_C1 |  | NHP   | 0/4                 | Bifidobacterium dentium        | [245]                   | No                |
| 113 | 1679.240    | Bifidobacterium longum subsp. longum strain BIO6283    |  | NHP   | 0/60                | Bifidobacterium longum         | [246]                   | No                |
| 114 | 1720313.7   | Bittarella massiliensis strain BIOML-A2                |  | NHP   | 0/2                 | Bittarella massiliensis        | [240, 247]              | No                |
| 115 | 1737424.51  | Blautia massiliensis strain BIOML-A2                   |  | NHP   | 0/4                 | Blautia massiliensis           | [240, 248]              | No                |
| 116 | 40520.1620  | Blautia obeum strain BIOML-A1                          |  | NHP   | 0/28                | Blautia obeum                  | [240, 249]              | No                |
| 117 | 2584624.3   | Blautia sp. BIOML-A1                                   |  | NHP   | 0/40                | unclassified Blautia           | [240, 250]              | No                |
| 118 | 418240.274  | Blautia wexlerae strain BIOML-A15                      |  | NHP   | 0/17                | Blautia wexlerae               | [240, 251]              | No                |
| 119 | 2584625.3   | Butyricoccus sp. BIOML-A1                              |  | NHP   | 0/18                | unclassified Butyricoccus      | [240, 252]              | No                |
| 120 | 2584626.3   | Catenibacterium sp. BIOML-A1                           |  | NHP   | 0/4                 | unclassified Catenibacterium   | [240, 253]              | No                |
| 121 | 1520.337    | Clostridium beijerinckii strain BIOML-A8               |  | NHP   | 0/11                | Clostridium beijerinckii       | [240, 254]              | No                |
| 122 | 2547410.3   | Clostridium sp. C5-48                                  |  | NHP   | 1/88                | unclassified Clostridium       | [10]                    | No                |
| 123 | 2584634.3   | Coprobacillus sp. BIOML-A1                             |  | NHP   | 0/39                | unclassified Coprobacillus     | [240, 255]              | No                |
| 124 | 410072.542  | Coprococcus comes strain F22                           |  | NHP   | 0/6                 | Coprococcus comes              | [256]                   | No                |
| 125 | 2584635.3   | Coprococcus sp. BIOML-A1                               |  | NHP   | 0/17                | unclassified Coprococcus       | [240, 257]              | No                |
| 126 | 88431.891   | Dorea longicatena strain BIOML-A2                      |  | NHP   | 0/14                | Dorea longicatena              | [240, 258]              | No                |
| 127 | 2584637.3   | Dorea sp. BIOML-A1                                     |  | NHP   | 0/9                 | unclassified Dorea             | [240, 259]              | No                |
| 128 | 39490.144   | Eubacterium ramulus strain BIOML-A2                    |  | NHP   | 0/4                 | Eubacterium ramulus            | [240, 260]              | No                |

Continued on next page

|     | Genome ID   | Genome Name                                      | Label | HP/NHP <sup>1</sup> | Species                            | References <sup>2</sup> | OPP. <sup>3</sup> |
|-----|-------------|--------------------------------------------------|-------|---------------------|------------------------------------|-------------------------|-------------------|
| 129 | 2584644.3   | Eubacterium sp. BIOML-A2                         | NHP   | 0/29                | unclassified Eubacterium           | [240, 261]              | No                |
| 130 | 853.7356    | Faecalibacterium prausnitzii strain BIOML-B10    | NHP   | 0/39                | Faecalibacterium prausnitzii       | [240, 262]              | No                |
| 131 | 2584645.3   | Faecalibacterium sp. BIOML-A1                    | NHP   | 0/11                | unclassified Faecalibacterium      | [240, 263]              | No                |
| 132 | 292800.500  | Flavonifractor plautii strain BIOML-A3           | NHP   | 0/3                 | Flavonifractor plautii             | [240, 264]              | No                |
| 133 | 1335613.28  | Gordonibacter urolithinfaciens strain BIOML-A1   | NHP   | 0/1                 | Gordonibacter urolithinfaciens     | [240, 265]              | No                |
| 134 | 2686092.3   | Halobacillus sp. Marseille-Q1234                 | NHP   | 0/1                 | unclassified Halobacillus          | [266]                   | No                |
| 135 | 1468449.9   | Holdemania massiliensis strain BIOML-A4          | NHP   | 0/5                 | Holdemania massiliensis            | [240, 267]              | No                |
| 136 | 1613.506    | Lactobacillus fermentum strain CVM-347           | NHP   | 1/11                | Lactobacillus fermentum            | [268]                   | No                |
| 137 | 1587.365    | Lactobacillus helveticus strain DLBSA201         | NHP   | 0/3                 | Lactobacillus helveticus           | [269]                   | No                |
| 138 | 1597.462    | Lactobacillus paracasei strain BIOML-A2          | NHP   | 0/19                | Lactobacillus paracasei            | [240, 270]              | No                |
| 139 | 47715.653   | Lactobacillus rhamnosus strain BIOML-A3          | NHP   | 2/20                | Lactobacillus rhamnosus            | [240, 271]              | No                |
| 140 | 1623.232    | Lactobacillus ruminis strain BIOML-A15           | NHP   | 0/31                | Lactobacillus ruminis              | [240, 272]              | No                |
| 141 | 2584658.3   | Lactonifactor sp. BIOML-A5                       | NHP   | 0/7                 | unclassified Lactonifactor         | [240, 273]              | No                |
| 142 | 2584661.3   | Megasphaera sp. BIOML-A1                         | NHP   | 0/4                 | unclassified Megasphaera           | [240, 274]              | No                |
| 143 | 28118.1621  | Odoribacter splanchnicus strain BIOML-A4         | NHP   | 0/16                | Odoribacter splanchnicus           | [240, 275]              | No                |
| 144 | 823.3208    | Parabacteroides distasonis strain BIOML-A11      | NHP   | 5/66                | Parabacteroides distasonis         | [240, 276]              | No                |
| 145 | 328812.119  | Parabacteroides goldsteinii strain BIOML-A2      | NHP   | 1/11                | Parabacteroides goldsteinii        | [240, 277]              | No                |
| 146 | 46503.1849  | Parabacteroides merdae strain BIOML-A28          | NHP   | 0/43                | Parabacteroides merdae             | [240, 278]              | No                |
| 147 | 487175.63   | Parasutterella excrementihominis strain BIOML-A4 | NHP   | 0/15                | Parasutterella excrementihominis   | [240, 279]              | No                |
| 148 | 33025.448   | Phascolarctobacterium faecium strain BIOML-A6    | NHP   | 0/17                | Phascolarctobacterium faecium      | [240, 280]              | No                |
| 149 | 2049039.16  | Phascolarctobacterium sp. P2A-2                  | NHP   | 0/2                 | unclassified Phascolarctobacterium | [280]                   | No                |
| 150 | 571933.10   | Piscibacillus halophilus strain Marseille-Q1613  | NHP   | 0/1                 | Piscibacillus halophilus           | [281]                   | No                |
| 151 | 2584670.3   | Pseudoflavonifractor sp. BIOML-A8                | NHP   | 0/17                | unclassified Pseudoflavonifractor  | [240, 282]              | No                |
| 152 | 301302.2226 | Roseburia faecis strain BIOML-A1                 | NHP   | 0/2                 | Roseburia faecis                   | [240, 283]              | No                |
| 153 | 166486.885  | Roseburia intestinalis strain BIOML-A1           | NHP   | 0/6                 | Roseburia intestinalis             | [240, 284]              | No                |
| 154 | 40518.2573  | Ruminococcus bromii strain BIOML-A2              | NHP   | 3/12                | Ruminococcus bromii                | [240, 285]              | No                |
| 155 | 592978.29   | Ruminococcus faecis strain BIOML-A1              | NHP   | 0/1                 | [Ruminococcus] faecis              | [240, 286]              | No                |
| 156 | 1550024.413 | Ruthenibacterium lactatiformans strain BIOML-A15 | NHP   | 0/13                | Ruthenibacterium lactatiformans    | [240, 287]              | No                |
| 157 | 2681551.3   | Staphylococcus sp. 170179                        | NHP   | 3/2                 | unclassified Staphylococcus        | [288]                   | No                |

Continued on next page

|     | Genome ID    | Genome Name                                                  | Label | HP/NHP <sup>1</sup> | Species                                 | References <sup>2</sup> | OPP. <sup>3</sup> |
|-----|--------------|--------------------------------------------------------------|-------|---------------------|-----------------------------------------|-------------------------|-------------------|
| 158 | 1304.1361    | Streptococcus salivarius strain BIOML-A17                    | NHP   | 2/43                | Streptococcus salivarius                | [240, 289]              | No                |
| 159 | 2053618.40   | Subdoligranulum sp. strain P1-4                              | NHP   | 0/6                 | unclassified Subdoligranulum            | [290]                   | No                |
| 160 | 2093855.3    | Veillonellaceae bacterium M2-8                               | NHP   | 0/3                 | unclassified Veillonellaceae            | [291, 292]              | No                |
| 161 | 39485.1649   | [Eubacterium] eligens strain BIOML-A1                        | NHP   | 0/13                | Lachnospira eligens                     | [240, 293]              | No                |
| 162 | 39491.2484   | [Eubacterium] rectale strain BIOML-A5                        | NHP   | 6/70                | unclassified Lachnospiraceae            | [240, 294]              | No                |
| 163 | 33039.1028   | [Ruminococcus] torques strain BIOML-A5                       | NHP   | 0/9                 | [Ruminococcus] torques                  | [240, 295]              | No                |
| 164 | 1872444.542  | Alistipes sp. strain P1-1                                    | NHP   | 0/5                 | unclassified Alistipes                  | [296]                   | Yes               |
| 165 | 1396.2563    | Bacillus cereus strain 2-1                                   | NHP   | 16/7                | Bacillus cereus                         | [297, 298]              | Yes               |
| 166 | 79880.75     | Bacillus clausii strain B619/R                               | NHP   | 5/0                 | Bacillus clausii                        | [299]                   | Yes               |
| 167 | 818.1282     | Bacteroides thetaiotaomicron strain F9-2                     | NHP   | 2/15                | Bacteroides thetaiotaomicron            | [300, 301]              | Yes               |
| 168 | 821.3918     | Bacteroides vulgatus strain H23                              | NHP   | 3/70                | Bacteroides vulgatus                    | [302]                   | Yes               |
| 169 | 2044936.47   | Bacteroidia bacterium strain T-B-M_MAG_00007                 | NHP   | 0/3                 | unclassified Bacteroidia                | [303]                   | Yes               |
| 170 | 2044595.31   | Candidatus Gracilibacteria bacterium strain P-C-F_MAG_00005  | NHP   | 0/2                 | unclassified Candidatus Gracilibacteria | [304]                   | Yes               |
| 171 | 2026720.132  | Candidatus Saccharibacteria bacterium strain T-D-F_MAG_00008 | NHP   | 0/20                | unclassified Saccharibacteria           | [303]                   | Yes               |
| 172 | 44737.7      | Capnocytophaga sp. strain P-B-M_MAG_00008                    | NHP   | 0/1                 | unclassified Capnocytophaga             | [305]                   | Yes               |
| 173 | 35703.89     | Citrobacter amalonaticus strain BIOML-A5                     | NHP   | 1/13                | Citrobacter amalonaticus                | [240, 306]              | Yes               |
| 174 | 1898207.3769 | Clostridiales bacterium strain T-D-F_MAG_00006               | NHP   | 0/9                 | unclassified Clostridiales              | [303]                   | Yes               |
| 175 | 1492.181     | Clostridium butyricum strain BIOML-A2                        | NHP   | 0/2                 | Clostridium butyricum                   | [240, 307]              | Yes               |
| 176 | 74426.1601   | Collinsella aerofaciens strain BIOML-A15                     | NHP   | 0/20                | Collinsella aerofaciens                 | [240, 95]               | Yes               |
| 177 | 2584631.3    | Collinsella sp. BIOML-A4                                     | NHP   | 0/82                | unclassified Collinsella                | [240, 95]               | Yes               |
| 178 | 218538.1051  | Dialister invisus strain P2A-1                               | NHP   | 0/1                 | Dialister invisus                       | [308]                   | Yes               |
| 179 | 2584641.3    | Eggerthella sp. BIOML-A4                                     | NHP   | 0/5                 | unclassified Eggerthella                | [240, 309]              | Yes               |
| 180 | 158836.472   | Enterobacter hormaechei strain BIOML-A4                      | NHP   | 305/6               | Enterobacter hormaechei                 | [240, 310]              | Yes               |
| 181 | 33945.49     | Enterococcus avium strain BIOML-A3                           | NHP   | 4/5                 | Enterococcus avium                      | [240, 311]              | Yes               |
| 182 | 53345.154    | Enterococcus durans strain BIOML-A46                         | NHP   | 0/67                | Enterococcus durans                     | [240, 312]              | Yes               |
| 183 | 1352.8997    | Enterococcus faecium strain C59                              | NHP   | 666/7               | Enterococcus faecium                    | [66]                    | Yes               |
| 184 | 1354.275     | Enterococcus hirae strain BIOML-A52                          | NHP   | 0/87                | Enterococcus hirae                      | [240, 313]              | Yes               |
| 185 | 53346.66     | Enterococcus mundtii strain BIOML-A5                         | NHP   | 1/14                | Enterococcus mundtii                    | [240, 314]              | Yes               |
| 186 | 71452.14     | Enterococcus raffinosus strain BIOML-A1                      | NHP   | 0/1                 | Enterococcus raffinosus                 | [240, 315]              | Yes               |
| 187 | 1260.144     | Finegoldia magna strain BIOML-A2                             | NHP   | 10/2                | Finegoldia magna                        | [240, 316]              | Yes               |
| 188 | 2584653.3    | Finegoldia sp. BIOML-A5                                      | NHP   | 0/5                 | unclassified Finegoldia                 | [240, 317]              | Yes               |
| 189 | 1871037.250  | Flavobacteriaceae bacterium strain P-A-M_MAG_00002           | NHP   | 1/3                 | unclassified Flavobacteriaceae          | [318]                   | Yes               |

Continued on next page

|     | Genome ID   | Genome Name                                             |  | Label | HP/NHP <sup>1</sup> | Species                     |  | References <sup>2</sup> | OPP. <sup>3</sup> |
|-----|-------------|---------------------------------------------------------|--|-------|---------------------|-----------------------------|--|-------------------------|-------------------|
| 190 | 471189.25   | Gordonibacter pamelaee strain BIOML-A2                  |  | NHP   | 0/1                 | Gordonibacter pamelaee      |  | [240, 319]              | Yes               |
| 191 | 104608.5    | Leptotrichia sp. strain T-B-M_MAG_00008                 |  | NHP   | 0/1                 | unclassified Leptotrichia   |  | [303]                   | Yes               |
| 192 | 1246.49     | Leuconostoc lactis strain BIOML-A1                      |  | NHP   | 0/2                 | Leuconostoc lactis          |  | [240, 320]              | Yes               |
| 193 | 2049035.5   | Mogibacterium sp. strain T-C-M_MAG_00002                |  | NHP   | 0/3                 | unclassified Mogibacterium  |  | [303]                   | Yes               |
| 194 | 1505.72     | Paeniclostridium sordellii strain BIOML-A6              |  | NHP   | 4/2                 | Paeniclostridium sordellii  |  | [240, 321]              | Yes               |
| 195 | 165179.2440 | Prevotella copri strain P2B-2                           |  | NHP   | 0/21                | Prevotella copri            |  | [322]                   | Yes               |
| 196 | 59823.699   | Prevotella sp. strain P-A-F_MAG_00002                   |  | NHP   | 1/7                 | unclassified Prevotella     |  | [323, 324, 325]         | Yes               |
| 197 | 1282.3805   | Staphylococcus epidermidis strain JH                    |  | NHP   | 85/69               | Staphylococcus epidermidis  |  | [326, 327]              | Yes               |
| 198 | 1311.2752   | Streptococcus agalactiae strain M134                    |  | NHP   | 236/5               | Streptococcus agalactiae    |  | [328]                   | Yes               |
| 199 | 1318.781    | Streptococcus parasanguinis strain BIOML-A16            |  | NHP   | 3/25                | Streptococcus parasanguinis |  | [240, 329]              | Yes               |
| 200 | 2584682.3   | Streptococcus sp. BIOML-A1                              |  | NHP   | 4/5                 | unclassified Streptococcus  |  | [240, 330]              | Yes               |
| 201 | 39778.876   | Veillonella dispar strain BIOML-A2                      |  | NHP   | 0/3                 | Veillonella dispar          |  | [240, 331]              | Yes               |
| 202 | 29466.1006  | Veillonella parvula strain BIOML-A1                     |  | NHP   | 1/4                 | Veillonella parvula         |  | [240, 332]              | Yes               |
| 203 | 1522.125    | [Clostridium] innocuum strain BIOML-A2                  |  | NHP   | 0/15                | [Clostridium] innocuum      |  | [240, 333]              | Yes               |
| 204 | 2044938.12  | candidate division SR1 bacterium strain P-B-M_MAG_00018 |  | NHP   | 0/19                | unclassified Bacteria       |  | [303]                   | Yes               |

**Table S3:** A list of genomes included in the WSPC test set. <sup>1</sup>HP to NHP ratio among the labeled genomes of the corresponding species (before choosing a representative from each species). <sup>2</sup>References to literature or a database entry asserting the label and the "group" annotations the corresponding genome belongs to. <sup>3</sup>OPP: opportunistic.

## References

- [1] Ruth R Miller, Vincent Montoya, Jennifer L Gardy, David M Patrick, and Patrick Tang. Metagenomics for pathogen detection in public health. *Genome Medicine*, 5(9):81, 2013.
- [2] Carlus Deneke, Robert Rentzsch, and Bernhard Y Renard. Paprbag: A machine learning approach for the detection of novel pathogens from ngs data. *Scientific Reports*, 7(1):1–13, 2017.
- [3] Jakub M Bartoszewicz, Anja Seidel, Robert Rentzsch, and Bernhard Y Renard. Deepac: predicting pathogenic potential of novel dna with reverse-complement neural networks. *Bioinformatics*, 36(1):81–89, 2020.
- [4] Massimo Andreatta, Morten Nielsen, Frank Møller Aarestrup, and Ole Lund. In silico prediction of human pathogenicity in the  $\gamma$ -proteobacteria. *PloS One*, 5(10):e13680, 2010.
- [5] Gregorio Iraola, Gustavo Vazquez, Lucía Spangenberg, and Hugo Naya. Reduced set of virulence genes allows high accuracy prediction of bacterial pathogenicity in humans. *PloS One*, 7(8):e42144, 2012.

- [6] Salvatore Cosentino, Mette Voldby Larsen, Frank Møller Aarestrup, and Ole Lund. Pathogenfinder-distinguishing friend from foe using bacterial whole genome sequence data. *PLoS One*, 8(10):e77302, 2013.
- [7] Eran Barash, Neta Sal-Man, Sivan Sabato, and Michal Ziv-Ukelson. Bacpacs—bacterial pathogenicity classification via sparse-svm. *Bioinformatics*, 35(12):2001–2008, 2019.
- [8] Ulrike Kappler, Karen Davenport, Scott Beatson, Susan Lucas, Alla Lapidus, Alex Copeland, Kerrie W Berry, Tijana Glavina Del Rio, Nancy Hammon, Eileen Dalin, et al. Complete genome sequence of the facultatively chemolithoautotrophic and methylophilic alpha proteobacterium *starkeya novella* type strain (atcc 8093 t). *Standards in Genomic Sciences*, 7(1):44–58, 2012.
- [9] Maria C Urdaci, Philippe Bressollier, and Irina Pinchuk. *Bacillus clausii* probiotic strains: antimicrobial and immunomodulatory activities. *Journal of Clinical Gastroenterology*, 38:S86–S90, 2004.
- [10] NCBI. *Clostridium* sp. c5-48, Genome ID 2547410.3. <https://www.ncbi.nlm.nih.gov/biosample?term=txid2547410>.
- [11] Laurie Ann Ximénez-Fyvie, Anne D Haffajee, and Sigmund S Socransky. Microbial composition of supra-and subgingival plaque in subjects with adult periodontitis. *Journal of Clinical Periodontology*, 27(10):722–732, 2000.
- [12] Yiping W Han. *Fusobacterium nucleatum*: a commensal-turned pathogen. *Current Opinion in Microbiology*, 23:141–147, 2015.
- [13] Hwa-Sook Kim, Dae-Sil Lee, Young-Hyo Chang, Min Jung Kim, Sukhoon Koh, Joongsu Kim, Jin-Hyo Seong, Soo Keun Song, Hwan Seon Shin, Jae-Beum Son, et al. Application of *rproB* and zinc protease gene for use in molecular discrimination of *Fusobacterium nucleatum* subspecies. *Journal of Clinical Microbiology*, 48(2):545–553, 2010.
- [14] Takayuki Nambu, Osamu Tsuzukibashi, Satoshi Uchibori, Kazuyoshi Yamane, Takeshi Yamanaka, Hugo Maruyama, Pao-Li Wang, Naho Mugita, Hiroki Morioka, Kazuya Takahashi, et al. Complete genome sequence of *Rothia aerea* type strain jcm 11412, isolated from air in the russian space laboratory mir. *Genome announcements*, 4(6):e01444–16, 2016.
- [15] T Ryan Hoens and Nitesh V Chawla. Imbalanced datasets: from sampling to classifiers. *Imbalanced learning: Foundations, Algorithms, and Applications*, pages 43–59, 2013.
- [16] Kendrick Boyd, Kevin H Eng, and C David Page. Area under the precision-recall curve: point estimates and confidence intervals. In *Joint European conference on machine learning and knowledge discovery in databases*, pages 451–466. Springer, 2013.
- [17] James A Hanley and Barbara J McNeil. The meaning and use of the area under a receiver operating characteristic (roc) curve. *Radiology*, 143(1):29–36, 1982.



- [18] Jin Huang and Charles X Ling. Using auc and accuracy in evaluating learning algorithms. *IEEE Transactions on Knowledge and Data Engineering*, 17(3):299–310, 2005.
- [19] Jesse Davis and Mark Goadrich. The relationship between precision-recall and roc curves. In *Proceedings of the 23rd international conference on Machine learning*, pages 233–240, 2006.
- [20] Leo Breiman. Manual on setting up, using, and understanding random forests v3. 1. *Statistics Department University of California Berkeley, CA, USA*, 1:58, 2002.
- [21] Anne-Laure Boulesteix, Silke Janitza, Jochen Kruppa, and Inke R König. Overview of random forest methodology and practical guidance with emphasis on computational biology and bioinformatics. *Wiley Interdisciplinary Reviews: Data Mining and Knowledge Discovery*, 2(6):493–507, 2012.
- [22] Gaël Varoquaux, Lars Buitinck, Gilles Louppe, Olivier Grisel, Fabian Pedregosa, and Andreas Mueller. Scikit-learn: Machine learning without learning the machinery. *GetMobile: Mobile Computing and Communications*, 19(1):29–33, 2015.
- [23] Jun Fan, Qun Liu, Quan Hao, Maikun Teng, and Liwen Niu. Crystal structure of uroporphyrinogen decarboxylase from bacillus subtilis. *Journal of Bacteriology*, 189(9):3573–3580, 2007.
- [24] Jacob E Choby and Eric P Skaar. Heme synthesis and acquisition in bacterial pathogens. *Journal of Molecular Biology*, 428(17):3408–3428, 2016.
- [25] Brian J Sheehan, Janine T Bossé, Amanda J Beddek, Andrew N Rycroft, J Simon Kroll, and Paul R Langford. Identification of actinobacillus pleuropneumoniae genes important for survival during infection in its natural host. *Infection and immunity*, 71(7):3960–3970, 2003.
- [26] Aart de Kok, Annechien F Hengeveld, Alejandro Martin, and Adrie H Westphal. The pyruvate dehydrogenase multi-enzyme complex from gram-negative bacteria. *Biochimica et Biophysica Acta (BBA)-Protein Structure and Molecular Enzymology*, 1385(2):353–366, 1998.
- [27] Shuangping Shi and Sabine Ehrt. Dihydrolipoamide acyltransferase is critical for mycobacterium tuberculosis pathogenesis. *Infection and Immunity*, 74(1):56–63, 2006.
- [28] D Scott Merrell, David L Hava, and Andrew Camilli. Identification of novel factors involved in colonization and acid tolerance of vibrio cholerae. *Molecular microbiology*, 43(6):1471–1491, 2002.
- [29] Thierry Gonzales and Janine Robert-Baudouy. Bacterial aminopeptidases: properties and functions. *FEMS Microbiology Reviews*, 18(4):319–344, 1996.
- [30] Guo Jing, SonG Xue, Li-fang ZOU, Hua-song ZOU, and Gong-you CHEN. The small and large subunits of carbamoyl-phosphate synthase exhibit diverse contributions to pathogenicity in xanthomonas citri subsp. citri. *Journal of Integrative Agriculture*, 14(7):1338–1347, 2015.

- [31] Jaideep Behari, Lisa Stagon, and Stephen B Calderwood. pepa, a gene mediating ph regulation of virulence genes in vibrio cholerae. *Journal of Bacteriology*, 183(1):178–188, 2001.
- [32] Hiro Nakamura, Keitarou Saiki, Tatsushi Mogi, and Yasuhiro Anraku. Assignment and functional roles of the cyoabcde gene products required for the escherichia coli bo-type quinol oxidase. *The Journal of Biochemistry*, 122(2):415–421, 1997.
- [33] Tao Xu, Jian Han, Jia Zhang, Jiazhen Chen, Nan Wu, Wenhong Zhang, and Ying Zhang. Absence of protoheme ix farnesyltransferase ctab causes virulence attenuation but enhances pigment production and persister survival in mrsa. *Frontiers in Microbiology*, 7:1625, 2016.
- [34] Emily Stevens, Maisem Laabei, Stewart Gardner, Greg A Somerville, and Ruth C Massey. Cytolytic toxin production by staphylococcus aureus is dependent upon the activity of the protoheme ix farnesyltransferase. *Scientific Reports*, 7(1):1–9, 2017.
- [35] Yan Zhang and Vadim N Gladyshev. Molybdoproteomes and evolution of molybdenum utilization. *Journal of Molecular Biology*, 379(4):881–899, 2008.
- [36] Rabeb Dhouib, Dk SM Pg Othman, Ama-Tawiah Essilfie, Phil M Hansbro, Jeffrey O Hanson, Alastair G McEwan, and Ulrike Kappler. Maturation of molybdoenzymes and its influence on the pathogenesis of non-typeable haemophilus influenzae. *Frontiers in Microbiology*, 6:1219, 2015.
- [37] Qifeng Zhong, Bostjan Kobe, and Ulrike Kappler. Molybdenum enzymes and how they support virulence in pathogenic bacteria. *Frontiers in Microbiology*, 11:3185, 2020.
- [38] Jeffrey C Waller, Kenneth W Ellens, Ghulam Hasnain, Sophie Alvarez, James R Rocca, and Andrew D Hanson. Evidence that the folate-dependent proteins ygfz and mnmeg have opposing effects on growth and on activity of the iron-sulfur enzyme miab. *Journal of Bacteriology*, 194(2):362–367, 2012.
- [39] Ilya A Osterman, Petr V Sergiev, Philipp O Tsvetkov, Alexander A Makarov, Alexey A Bogdanov, and Olga A Dontsova. Methylated 23s rrna nucleotide m2g1835 of escherichia coli ribosome facilitates subunit association. *Biochimie*, 93(4):725–729, 2011.
- [40] Li Ma, Austen Terwilliger, and Anthony W Maresso. Iron and zinc exploitation during bacterial pathogenesis. *Metallomics*, 7(12):1541–1554, 2015.
- [41] Rishabh Sharma, Deepa Keshari, Kumar Sachin Singh, Shailendra Yadav, and Sudheer Kumar Singh. Mra\_1571 is required for isoleucine biosynthesis and improves mycobacterium tuberculosis h37ra survival under stress. *Scientific Reports*, 6(1):1–12, 2016.
- [42] Yuichi Oogai, Masaya Yamaguchi, Miki Kawada-Matsuo, Tomoko Sumitomo, Shigetada Kawabata, and Hitoshi Komatsuzawa. Lysine and threonine biosynthesis from aspartate contributes to staphylococcus aureus growth in calf serum. *Applied and Environmental Microbiology*, 82(20):6150–6157, 2016.

- [43] Rasmus V Rasmussen, Vance G Fowler Jr, Robert Skov, and Niels E Bruun. Future challenges and treatment of staphylococcus aureus bacteremia with emphasis on mrsa. *Future Microbiology*, 6(1):43–56, 2011.
- [44] Tathyana M Amorim Franco and John S Blanchard. Bacterial branched-chain amino acid biosynthesis: structures, mechanisms, and drugability. *Biochemistry*, 56(44):5849–5865, 2017.
- [45] Lluís Masip, Karthik Veeravalli, and George Georgiou. The many faces of glutathione in bacteria. *Antioxidants & Redox Signaling*, 8(5-6):753–762, 2006.
- [46] Xiaoyuan Ren, Lili Zou, and Arne Holmgren. Targeting bacterial antioxidant systems for antibiotics development. *Current Medicinal Chemistry*, 27(12):1922–1939, 2020.
- [47] Tomokazu Ito, Nobuyuki Uozumi, Tatsunosuke Nakamura, Sayuri Takayama, Nobuyuki Matsuda, Hirofumi Aiba, Hisashi Hemmi, and Tohru Yoshimura. The implication of yggT of escherichia coli in osmotic regulation. *Bioscience, biotechnology, and biochemistry*, 73(12):2698–2704, 2009.
- [48] Roy D Sleator and Colin Hill. Bacterial osmoadaptation: the role of osmolytes in bacterial stress and virulence. *FEMS Microbiology Reviews*, 26(1):49–71, 2002.
- [49] Chynna N Broxton and Valeria C Culotta. Sod enzymes and microbial pathogens: surviving the oxidative storm of infection. *PLoS Pathogens*, 12(1):e1005295, 2016.
- [50] A Battistoni. Role of prokaryotic Cu, Zn superoxide dismutase in pathogenesis. *Biochemical Society Transactions*, 31(6):1326–1329, 2003.
- [51] Robert J Cybulski Jr, Patrick Sanz, Farhang Alem, Scott Stibitz, Robert L Bull, and Alison D O’Brien. Four superoxide dismutases contribute to bacillus anthracis virulence and provide spores with redundant protection from oxidative stress. *Infection and immunity*, 77(1):274–285, 2009.
- [52] Debra L Piddington, Ferric C Fang, Tracey Laessig, Andrea M Cooper, Ian M Orme, and Nancy A Buchmeier. Cu, Zn superoxide dismutase of mycobacterium tuberculosis contributes to survival in activated macrophages that are generating an oxidative burst. *Infection and immunity*, 69(8):4980–4987, 2001.
- [53] Yumi Iwadate, Noriyuki Funabasama, and Jun-ichi Kato. Involvement of formate dehydrogenases in stationary phase oxidative stress tolerance in escherichia coli. *FEMS Microbiology Letters*, 364(20):fmx193, 2017.
- [54] Inga Oberpichler, Antonio J Pierik, Janine Wesslowski, Richard Pokorny, Ran Rosen, Michal Vugman, Fan Zhang, Olivia Neubauer, Eliora Z Ron, Alfred Batschauer, et al. A photolyase-like protein from agrobacterium tumefaciens with an iron-sulfur cluster. *PLoS One*, 6(10):e26775, 2011.

- [55] Eun-Jeong Yoon, Jung Ok Kim, Ji Woo Yang, Hwa Su Kim, Kwang Jun Lee, Seok Hoon Jeong, Hyukmin Lee, and Kyungwon Lee. The bla<sub>oxa-23</sub>-associated transposons in the genome of acinetobacter spp. represent an epidemiological situation of the species encountering carbapenems. *Journal of Antimicrobial Chemotherapy*, 72(10):2708–2714, 2017.
- [56] Anton Y Peleg, Harald Seifert, and David L Paterson. Acinetobacter baumannii: emergence of a successful pathogen. *Clinical Microbiology Reviews*, 21(3):538–582, 2008.
- [57] Katherine E Bowden, Michael R Weigand, Yanhui Peng, Pamela K Cassiday, Scott Sammons, Kristen Knipe, Lori A Rowe, Vladimir Loparev, Mili Sheth, Keeley Weening, et al. Genome structural diversity among 31 bordetella pertussis isolates from two recent us whooping cough statewide epidemics. *MSphere*, 1(3):e00036–16, 2016.
- [58] Derek S Sarovich, Jessica R Webb, Matthew C Pitman, Linda T Viberg, Mark Mayo, Robert W Baird, Jennifer M Robson, Bart J Currie, and Erin P Price. Raising the stakes: loss of efflux pump regulation decreases meropenem susceptibility in burkholderia pseudomallei. *Clinical Infectious Diseases*, 67(2):243–250, 2018.
- [59] Mihnea R Mangalea, Brooke A Plumley, and Bradley R Borlee. Nitrate sensing and metabolism inhibit biofilm formation in the opportunistic pathogen burkholderia pseudomallei by reducing the intracellular concentration of c-di-gmp. *Frontiers in Microbiology*, 8:1353, 2017.
- [60] Valentina A Feodorova, Sergey S Zaitsev, Mariya A Khizhnyakova, Yury V Saltykov, Vitaliy V Evstifeev, Fidail M Khusainov, Sergey I Yakovlev, Olga S Larionova, and Vladimir L Motin. Data of de novo genome assembly of the chlamydia psittaci strain isolated from the livestock in volga region, russian federation. *Data in Brief*, 29:105190, 2020.
- [61] Robert J Suchland, Zoe E Dimond, Timothy E Putman, and Daniel D Rockey. Demonstration of persistent infections and genome stability by whole-genome sequencing of repeat-positive, same-serovar chlamydia trachomatis collected from the female genital tract. *The Journal of Infectious Diseases*, 215(11):1657–1665, 2017.
- [62] PATRIC Database. Citrobacter koseri strain FDAARGOS\_287, Genome ID 545.38. <https://www.patricbrc.org/view/Genome/545.38>.
- [63] Chao Yuan, Zhiqiu Yin, Junyue Wang, Chengqian Qian, Yi Wei, Si Zhang, Lingyan Jiang, and Bin Liu. Comparative genomic analysis of citrobacter and key genes essential for the pathogenicity of citrobacter koseri. *Frontiers in Microbiology*, 10:2774, 2019.
- [64] Runa Kuley, Eric Kuijt, Mari A Smits, Hendrik IJ Roest, Hilde E Smith, and Alex Bossers. Genome plasticity and polymorphisms in critical genes correlate with increased virulence of dutch outbreak-related coxiella burnetii strains. *Frontiers in Microbiology*, 8:1526, 2017.
- [65] Andrew H Buultjens, Margaret MC Lam, Susan Ballard, Ian R Monk, Andrew A Mahony, Elizabeth A Grabsch, M Lindsay Grayson, Stanley Pang, Geoffrey W Coombs, J Owen Robinson,

- et al. Evolutionary origins of the emergent st796 clone of vancomycin resistant enterococcus faecium. *PeerJ*, 5:e2916, 2017.
- [66] Xuewei Zhou, Rob JL Willems, Alexander W Friedrich, John WA Rossen, and Erik Bathoorn. Enterococcus faecium: from microbiological insights to practical recommendations for infection control and diagnostics. *Antimicrobial Resistance & Infection Control*, 9(1):1–13, 2020.
- [67] PATRIC Database. Escherichia coli strain FDAARGOS\_433, Genome ID 562.22306. <https://www.patricbrc.org/view/Genome/562.22306>.
- [68] Kenji K Kojima, Yoshikazu Furuta, Koji Yahara, Masaki Fukuyo, Yuh Shiwa, Shin Nishiumi, Masaru Yoshida, Takeshi Azuma, Hirofumi Yoshikawa, and Ichizo Kobayashi. Population evolution of helicobacter pylori through diversification in dna methylation and interstrain sequence homogenization. *Molecular Biology and Evolution*, 33(11):2848–2859, 2016.
- [69] PATRIC Database. Klebsiella pneumoniae strain KP9, Genome ID 573.16474. <https://www.patricbrc.org/view/Genome/573.16474>.
- [70] Xiaohui Chi, Björn Berglund, Huiyun Zou, Beiwen Zheng, Stefan Börjesson, Xiang Ji, Jakob Ottoson, Cecilia Stålsby Lundborg, Xuewen Li, and Lennart E Nilsson. Characterization of clinically relevant strains of extended-spectrum  $\beta$ -lactamase-producing klebsiella pneumoniae occurring in environmental sources in a rural area of china by using whole-genome sequencing. *Frontiers in Microbiology*, 10:211, 2019.
- [71] Francis Muchaamba, Claudia Guldemann, Taurai Tasara, María Inés Mota, Valeria Braga, Gustavo Varela, Gabriela Algorta, Jochen Klumpp, Marco Jermini, and Roger Stephan. Full-genome sequence of listeria monocytogenes strain h34, isolated from a newborn with sepsis in uruguay. *Genome announcements*, 5(24):e00544–17, 2017.
- [72] MN Gonzalez-Perez, MI Murcia, C Parra-Lopez, J Blom, and Andreas Tauch. Deciphering the virulence factors of the opportunistic pathogen mycobacterium colombiense. *New Microbes and New Infections*, 14:98–105, 2016.
- [73] Hanako Fukano, Mitsunori Yoshida, Yuko Kazumi, Nagatoshi Fujiwara, Kinya Katayama, Yoshitoshi Ogura, Tetsuya Hayashi, Yuji Miyamoto, Noriki Fujimoto, Wang Hongsheng, et al. Mycobacterium shigaense sp. nov., a slow-growing, scotochromogenic species, is a member of the mycobacterium simiae complex. *International Journal of Systematic and Evolutionary Microbiology*, 68(8):2437–2442, 2018.
- [74] H Fukano, O Hiranuma, Y Matsui, S Tanaka, and Y Hoshino. The first case of chronic pulmonary mycobacterium shigaense infection in an immunocompetent patient. *New Microbes and New Infections*, 33:100630, 2020.
- [75] Patricia Sheen, David Requena, Eduardo Gushiken, Robert H Gilman, Ricardo Antiparra, Bryan Lucero, Pilar Lizárraga, Basilio Cieza, Elisa Roncal, Louis Grandjean, et al. A multiple genome

- analysis of mycobacterium tuberculosis reveals specific novel genes and mutations associated with pyrazinamide resistance. *BMC Genomics*, 18(1):769, 2017.
- [76] Tsuyoshi Kenri, Masato Suzuki, Atsuko Horino, Tsuyoshi Sekizuka, Makoto Kuroda, Hiroyuki Fujii, Toru Hashimoto, Hiroshi Nakajima, Hitomi Ohya, and Keigo Shibayama. Complete genome sequences of the p1 gene type 2b and 2c strains mycoplasma pneumoniae kch-402 and kch-405. *Genome announcements*, 5(24):e00513–17, 2017.
- [77] PATRIC Database. Nocardia brasiliensis strain FDAARGOS\_352, Genome ID 37326.9. <https://www.patricbrc.org/view/Genome/37326.9>.
- [78] Barbara A Brown-Elliott, June M Brown, Patricia S Conville, and Richard J Wallace. Clinical and laboratory features of the nocardia spp. based on current molecular taxonomy. *Clinical Microbiology Reviews*, 19(2):259–282, 2006.
- [79] Mariko Naito, Yoshitoshi Ogura, Takehiko Itoh, Mikio Shoji, Masaaki Okamoto, Tetsuya Hayashi, and Koji Nakayama. The complete genome sequencing of prevotella intermedia strain oma14 and a subsequent fine-scale, intra-species genomic comparison reveal an unusual amplification of conjugative and mobile transposons and identify a novel prevotella-lineage-specific repeat. *DNA Research*, 23(1):11–19, 2016.
- [80] Simone G Santos, Cláudio G Diniz, Vânia L Silva, Francisca L Lima, Héliida M Andrade, Donat A Chapeaurouge, Jonas Perales, José Carlos Serufo, Maria Auxiliadora R Carvalho, and Luiz M Farias. Differentially regulated proteins in prevotella intermedia after oxidative stress analyzed by 2d electrophoresis and mass spectrometry. *Anaerobe*, 18(1):76–82, 2012.
- [81] Weihua Huang, Joelle El Hamouche, Guiqing Wang, Melissa Smith, Changhong Yin, Abhay Dhand, Nevenka Dimitrova, and John T Fallon. Integrated genome-wide analysis of an isogenic pair of pseudomonas aeruginosa clinical isolates with differential antimicrobial resistance to ceftolozane/tazobactam, ceftazidime/avibactam, and piperacillin/tazobactam. *International Journal of Molecular Sciences*, 21(3):1026, 2020.
- [82] Stephen P Diggle and Marvin Whiteley. Microbe profile: Pseudomonas aeruginosa: opportunistic pathogen and lab rat. *Microbiology*, 166(1):30–33, 2020.
- [83] Artur J Sabat, Sandra M Hermelijn, Viktoria Akkerboom, Amadu Juliana, John E Degener, Hajo Grundmann, and Alexander W Friedrich. Complete-genome sequencing elucidates outbreak dynamics of ca-mrsa usa300 (st8-spa t008) in an academic hospital of paramaribo, republic of suriname. *Scientific Reports*, 7(1):1–12, 2017.
- [84] James P O’Gara. Into the storm: Chasing the opportunistic pathogen staphylococcus aureus from skin colonisation to life-threatening infections. *Environmental Microbiology*, 19(10):3823–3833, 2017.
- [85] PATRIC Database. Streptococcus gordonii strain FDAARGOS\_257, Genome ID 1302.83. <https://www.patricbrc.org/view/Genome/1302.83>.

- [86] Ok-Jin Park, Yeongkag Kwon, Chaeyeon Park, Yoon Ju So, Tae Hwan Park, Sungho Jeong, Jintaek Im, Cheol-Heui Yun, and Seung Hyun Han. Streptococcus gordonii: Pathogenesis and host response to its cell wall components. *Microorganisms*, 8(12):1852, 2020.
- [87] Elio Issa, Tamara Salloum, Balig Panossian, David Ayoub, Edmond Abboud, and Sima Tokajian. Genome mining and comparative analysis of streptococcus intermedius causing brain abscess in a child. *Pathogens*, 8(1):22, 2019.
- [88] Yoshio Kondo, Yoshitoshi Ogura, Keiko Sato, Keigo Imamura, Tomonori Hoshino, Miyuki Nishiguchi, Tomoyuki Hasuwa, Hiroyuki Moriuchi, Tetsuya Hayashi, and Taku Fujiwara. Complete genome sequence of streptococcus sp. strain nps 308. *Genome announcements*, 4(6):e01349–16, 2016.
- [89] PATRIC Database. Haemophilus ducreyi strain FDAARGOS\_297, Genome ID 730.54. <https://www.patricbrc.org/view/Genome/730.54>.
- [90] Michelle Alfa. The laboratory diagnosis of haemophilus ducreyi. *Canadian Journal of Infectious Diseases and Medical Microbiology*, 16(1):31–34, 2005.
- [91] J Kang, W-H Chung, T-J Lim, S Lim, and Y-D Nam. Complete genome sequence of the bifidobacterium animalis subspecies lactis bl3, preventive probiotics for acute colitis and colon cancer. *New Microbes and New Infections*, 19:34–37, 2017.
- [92] PATRIC Database. Clostridioides difficile strain BR81, Genome ID 1496.1556. <https://www.patricbrc.org/view/Genome/1496.1556>.
- [93] Mehdi Goudarzi, Sima Sadat Seyedjavadi, Hossein Goudarzi, Elnaz Mehdizadeh Aghdam, and Saeed Nazeri. Clostridium difficile infection: epidemiology, pathogenesis, risk factors, and therapeutic options. *Scientifica*, 2014, 2014.
- [94] Satyabrata Bag, Tarini Shankar Ghosh, and Bhabatosh Das. Complete genome sequence of collinsella aerofaciens isolated from the gut of a healthy indian subject. *Genome announcements*, 5(47):e01361–17, 2017.
- [95] Dieter M Turlousse, Mitsuo Sakamoto, Takamasa Miura, Koji Narita, Akiko Ohashi, Yoshihito Uchino, Atsushi Yamazoe, Keishi Kameyama, Jun Terauchi, Moriya Ohkuma, et al. Complete genome sequence of collinsella aerofaciens jcm 10188t. *Microbiology resource announcements*, 9(16):e00134–20, 2020.
- [96] Satyabrata Bag, Tarini Shankar Ghosh, and Bhabatosh Das. Complete genome sequence of faecalibacterium prausnitzii isolated from the gut of a healthy indian adult. *Genome announcements*, 5(46):e01286–17, 2017.
- [97] II Ngom, I Hasni, CI Lo, SI Traore, A Fontanini, D Raoult, and F Fenollar. Taxono-genomics and description of gordonibacter massiliensis sp. nov., a new bacterium isolated from stool of healthy patient. *New Microbes and New Infections*, 33:100624, 2020.

- [98] Jisu Kang, Won-Hyong Chung, Tae-Joong Lim, Tae Woong Whon, Sanghyun Lim, and Young-Do Nam. Complete genome sequence of *Lactobacillus casei* lc5, a potential probiotics for atopic dermatitis. *Frontiers in Immunology*, 8:413, 2017.
- [99] Huey-Shi Lye, Tamotsu Kato, Wai-Yee Low, Todd D Taylor, Tulika Prakash, Lee-Ching Lew, Hiroshi Ohno, and Min-Tze Liong. *Lactobacillus fermentum* ftdc 8312 combats hypercholesterolemia via alteration of gut microbiota. *Journal of Biotechnology*, 262:75–83, 2017.
- [100] Zitong Ding, Anum Hani, Wenyan Li, Wencan Ke, Xusheng Guo, et al. Influence of a cholesterol-lowering strain *Lactobacillus plantarum* lp3 isolated from traditional fermented yak milk on gut bacterial microbiota and metabolome of rats fed with a high-fat diet. *Food & Function*, 11(9):8342–8353, 2020.
- [101] Piotr Jarocki, Marcin Podleśny, Mariusz Krawczyk, Agnieszka Glibowska, Jarosław Pawelec, Elwira Komoń-Janczara, Oleksandr Kholiavskyi, Michał Dworniczak, and Zdzisław Targoński. Complete genome sequence of *Lactobacillus rhamnosus* pen, a probiotic component of a medicine used in prevention of antibiotic-associated diarrhoea in children. *Gut Pathogens*, 10(1):1–6, 2018.
- [102] Giulia Bernardini, Giovanni Renzone, Maurizio Comanducci, Roberta Mini, Simona Arena, Chiara D’Ambrosio, Stefania Bambini, Lorenza Trabalzini, Guido Grandi, Paola Martelli, et al. Proteome analysis of *Neisseria meningitidis* serogroup a. *Proteomics*, 4(10):2893–2926, 2004.
- [103] M Bilen, F Cadoret, G Dubourg, P-E Fournier, Z Daoud, and Didier Raoult. ‘*Phoenicibacter massiliensis*’ gen. nov., sp. nov., a new bacterium isolated from the human gut of a pygmy woman. *New Microbes and New Infections*, 19:43–44, 2017.
- [104] Om Prakash, Suchismita Muduli, Rohit Kumar, Chanchal Kumari, Yogesh Nimonkar, Yogesh S Shouche, and Rakesh Sharma. Description of *Auricoccus indicus* gen. nov., sp. nov., isolated from skin of human ear. *International Journal of Systematic and Evolutionary Microbiology*, 67(5):1212–1218, 2017.
- [105] Voula Alexandraki, Maria Kazou, Jochen Blom, Bruno Pot, Konstantinos Papadimitriou, and Effie Tsakalidou. Comparative genomics of *Streptococcus thermophilus* support important traits concerning the evolution, biology and technological properties of the species. *Frontiers in Microbiology*, 10:2916, 2019.
- [106] Mi-Sun Kang, Hee-Sam Na, and Jong-Suk Oh. Coaggregation ability of *Weissella cibaria* isolates with *Fusobacterium nucleatum* and their adhesiveness to epithelial cells. *FEMS Microbiology Letters*, 253(2):323–329, 2005.
- [107] Michael A Mahowald, Federico E Rey, Henning Sedorf, Peter J Turnbaugh, Robert S Fulton, Aye Wollam, Neha Shah, Chunyan Wang, Vincent Magrini, Richard K Wilson, et al. Characterizing a model human gut microbiota composed of members of its two dominant bacterial phyla. *Proceedings of the National Academy of Sciences*, 106(14):5859–5864, 2009.



- [108] PATRIC Database. Burkholderia pseudomallei strain 2010007509, Genome ID 28450.655. <https://www.patricbrc.org/view/Genome/28450.655>.
- [109] Atsushi Iguchi, Nicholas R Thomson, Yoshitoshi Ogura, David Saunders, Tadasuke Ooka, Ian R Henderson, David Harris, M Asadulghani, Ken Kurokawa, Paul Dean, et al. Complete genome sequence and comparative genome analysis of enteropathogenic escherichia coli o127: H6 strain e2348/69. *Journal of Bacteriology*, 191(1):347–354, 2009.
- [110] PATRIC Database. Escherichia coli strain 5CRE51, Genome ID 562.16466. <https://www.patricbrc.org/view/Genome/562.16466>.
- [111] PATRIC Database. Escherichia coli strain ATCC 43896, Genome ID 562.22333. <https://www.patricbrc.org/view/Genome/562.22333>.
- [112] PATRIC Database. Escherichia coli strain Ecol\_276, Genome ID 562.15193. <https://www.patricbrc.org/view/Genome/562.15193>.
- [113] PATRIC Database. Escherichia coli strain FDAARGOS\_434, Genome ID 562.22323. <https://www.patricbrc.org/view/Genome/562.22323>.
- [114] PATRIC Database. Escherichia coli strain FDAARGOS\_448, Genome ID 562.22307. <https://www.patricbrc.org/view/Genome/562.22307>.
- [115] Timothy J Johnson, Jessica L Danzeisen, Bonnie Youmans, Kyle Case, Katharine Llop, Jeanette Munoz-Aguayo, Cristian Flores-Figueroa, Maliha Aziz, Nicole Stoesser, Evgeni Sokurenko, et al. Separate f-type plasmids have shaped the evolution of the h 30 subclone of escherichia coli sequence type 131. *MSphere*, 1(4):e00121–16, 2016.
- [116] PATRIC Database. Escherichia coli strain UFU\_EC98, Genome ID 562.22326. <https://www.patricbrc.org/view/Genome/562.22326>.
- [117] PATRIC Database. Klebsiella pneumoniae strain 459, Genome ID 573.16440. <https://www.patricbrc.org/view/Genome/573.16440>.
- [118] PATRIC Database. Klebsiella pneumoniae strain FDAARGOS\_436, Genome ID 573.15319. <https://www.patricbrc.org/view/Genome/573.15319>.
- [119] PATRIC Database. Listeria monocytogenes serotype 4b str. 02-1289 strain 02-1289, Genome ID 1196172.3. <https://www.patricbrc.org/view/Genome/1196172.3>.
- [120] PATRIC Database. Listeria monocytogenes serotype 4b str. 10-0809, Genome ID 1196162.3. <https://www.patricbrc.org/view/Genome/1196162.3>.
- [121] Temitope A Folaranmi, Cecilia B Kretz, Hajime Kamiya, Jessica R MacNeil, Melissa J Whaley, Amy Blain, Mike Antwi, Marie Dorsinville, Massimo Pacilli, Shamika Smith, et al. Increased risk for meningococcal disease among men who have sex with men in the united states, 2012–2015. *Clinical Infectious Diseases*, 65(5):756–763, 2017.

- [122] João Botelho, Filipa Grosso, Sandra Quinteira, Michael Brillhante, Helena Ramos, and Luísa Peixe. Two decades of bla vim-2-producing pseudomonas aeruginosa dissemination: an interplay between mobile genetic elements and successful clones. *Journal of Antimicrobial Chemotherapy*, 73(4):873–882, 2018.
- [123] PATRIC Database. Staphylococcus aureus strain JE2, Genome ID 1280.12234. <https://www.patricbrc.org/view/Genome/1280.12234>.
- [124] PATRIC Database. Staphylococcus aureus strain USA300-SUR11, Genome ID 1280.11677. <https://www.patricbrc.org/view/Genome/1280.11677>.
- [125] Tor Hofstad. The genus fusobacterium. In *The prokaryotes*, pages 4114–4126. Springer, 1992.
- [126] Jie Gao, Yubin Li, Yu Wan, Tongtong Hu, Liting Liu, Shaojie Yang, Zelong Gong, Qing Zeng, Yi Wei, Weijun Yang, et al. A novel postbiotic from lactobacillus rhamnosus gg with a beneficial effect on intestinal barrier function. *Frontiers in Microbiology*, 10:477, 2019.
- [127] ME Trujillo and M Goodfellow. Polyphasic taxonomic study of clinically significant actinomadura including the description of actinomadura latina sp. nov. *Zentralblatt für Bakteriologie*, 285(2):212–233, 1997.
- [128] Lingtong Tang, Jianglian Huang, Junping She, Kelei Zhao, and Yingshun Zhou. Co-occurrence of the bla kpc-2 and mcr-3.3 gene in aeromonas caviae scac2001 isolated from patients with diarrheal disease. *Infection and Drug Resistance*, 13:1527–1536, 2020.
- [129] Petros Ioannou. Escherichia hermannii infections in humans: a systematic review. *Tropical Medicine and Infectious Disease*, 4(1):17, 2019.
- [130] Zhenjun Li, Xu-ming Wang, Xiong Zhu, Miao Wang, Hai Cheng, Dan Li, and Zhi Guo Liu. Molecular characteristics of brucella isolates collected from humans in hainan province, china. *Frontiers in Microbiology*, 11:452, 2020.
- [131] Inês N Silva, Pedro M Santos, Mário R Santos, James EA Zlosnik, David P Speert, Sean W Buskirk, Eric L Brugger, Christopher M Waters, Vaughn S Cooper, and Leonilde M Moreira. Long-term evolution of burkholderia multivorans during a chronic cystic fibrosis infection reveals shifting forces of selection. *MSystems*, 1(3):e00029–16, 2016.
- [132] Samuel K Sheppard and Martin CJ Maiden. The evolution of campylobacter jejuni and campylobacter coli. *Cold Spring Harbor perspectives in biology*, 7(8):a018119, 2015.
- [133] PATRIC Database. Campylobacter coli strain 202823, Genome ID 195.2778. <https://www.patricbrc.org/view/Genome/195.2778>.
- [134] Aboi Igwaran and Anthony Ifeanyi Okoh. Human campylobacteriosis: A public health concern of global importance. *Heliyon*, 5(11):e02814, 2019.

- [135] PATRIC Database. *Campylobacter lari* strain 503734, Genome ID 201.69. <https://www.patricbrc.org/view/Genome/201.69>.
- [136] PATRIC Database. *Campylobacter* sp. CFSAN093243, Genome ID 2572066.4. <https://www.patricbrc.org/view/Genome/2572066.4>.
- [137] Veronica Bravo, Assaf Katz, Lorena Porte, Thomas Weitzel, Carmen Varela, Narjol Gonzalez-Escalona, and Carlos J Blondel. Genomic analysis of the diversity, antimicrobial resistance and virulence potential of clinical *Campylobacter jejuni* and *Campylobacter coli* strains from Chile. *PLOS Neglected Tropical Diseases*, 15(2):e0009207, 2021.
- [138] Michael W Peck and Arnoud HM van Vliet. Impact of *Clostridium botulinum* genomic diversity on food safety. *Current Opinion in Food Science*, 10:52–59, 2016.
- [139] Justine Schaeffer, Steliana Huhulescu, Anna Stoeger, Franz Allerberger, and Werner Ruppitsch. Draft genome sequences of six *Corynebacterium ulcerans* strains isolated from humans and animals in Austria, 2013 to 2019. *Microbiology Resource Announcements*, 9(36):e00946–20, 2020.
- [140] Tadasuke Ooka, Eisuke Tokuoka, Masato Furukawa, Tetsuya Nagamura, Yoshitoshi Ogura, Kokiichi Arisawa, Seiya Harada, and Tetsuya Hayashi. Human gastroenteritis outbreak associated with *Escherichia albertii*, Japan. *Emerging Infectious Diseases*, 19(1):144, 2013.
- [141] Christiana Jesumirhewe, Burkhard Springer, Franz Allerberger, and Werner Ruppitsch. Whole genome sequencing of extended-spectrum  $\beta$ -lactamase genes in enterobacteriaceae isolates from Nigeria. *PloS One*, 15(4):e0231146, 2020.
- [142] Rajagopalan Saranathan, Michael H Levi, Alice R Wattam, Adel Malek, Emmanuel Asare, Daniel S Behin, Debra H Pan, William R Jacobs Jr, and Wendy A Szymczak. *Helicobacter pylori* infections in the Bronx, New York: surveying antibiotic susceptibility and strain lineage by whole-genome sequencing. *Journal of Clinical Microbiology*, 58(3):e01591–19, 2020.
- [143] Freddy Haesebrouck, Frank Pasmans, Bram Flahou, Koen Chiers, Margo Baele, Tom Meyns, Annemie Decostere, and Richard Ducatelle. Gastric *Helicobacters* in domestic animals and nonhuman primates and their significance for human health. *Clinical Microbiology Reviews*, 22(2):202–223, 2009.
- [144] Camilla NR Trindade, Pedro HN Panzenhagen, Ricardo M Junqueira, Deyse CV Silva, Carlos A Conte-Junior, and Ilana T Balassiano. Draft genome sequences of *Leptospira interrogans* serovar Copenhageni strains isolated from patients with Weil’s disease in Brazil. *Microbiology Resource Announcements*, 9(7):e01538–19, 2020.
- [145] Vidhya Ramaswamy, Vincent Mary Cresence, Jayan S Rejitha, Mohandas Usha Lekshmi, KS Dharsana, Suryaprasad Priya Prasad, and Helan Mary Vijila. *Listeria*-review of epidemiology and pathogenesis. *Journal of Microbiology Immunology and Infection*, 40(1):4, 2007.

- [146] Philip Supply and Roland Brosch. The biology and epidemiology of mycobacterium canettii. In *Strain Variation in the Mycobacterium tuberculosis Complex: Its Role in Biology, Epidemiology and Control*, pages 27–41. Springer, 2017.
- [147] Tomasz Jagielski, Paulina Borówka, Zofia Bakula, Jakub Lach, Błażej Marciniak, Anna Brzostek, Jarosław Dziadek, Mikołaj Dziurzyński, Lian Pennings, Jakko Van Ingen, et al. Genomic insights into the mycobacterium kansasii complex: an update. *Frontiers in Microbiology*, 10:2918, 2020.
- [148] Aymen Abdelhaleem, Almonther Hershan, Pradeep Agarwal, Abdullah Farasani, Shaheed V Omar, Arshad Ismail, and Mushal Allam. Whole-genome sequencing of a mycobacterium tuberculosis strain belonging to lineage 1 (indo-oceanic) and the east african indian spoligotype, isolated in jazan, saudi arabia. *Microbiology Resource Announcements*, 9(33):e00717–20, 2020.
- [149] Daria Bottai, Wafa Frigui, Fadel Sayes, Mariagrazia Di Luca, Dalila Spadoni, Alexandre Pawlik, Marina Zoppo, Mickael Orgeur, Varun Khanna, David Hardy, et al. Tbd1 deletion as a driver of the evolutionary success of modern epidemic mycobacterium tuberculosis lineages. *Nature Communications*, 11(1):1–14, 2020.
- [150] Sarah Jane Quillin and H Steven Seifert. Neisseria gonorrhoeae host adaptation and pathogenesis. *Nature Reviews Microbiology*, 16(4):226, 2018.
- [151] Arif M Tanmoy, Emilie Westeel, Katrien De Bruyne, Johan Goris, Alain Rajoharison, Mohammad SI Sajib, Alex van Belkum, Samir K Saha, Florence Komurian-Pradel, and Hubert P Endtz. Salmonella enterica serovar typhi in bangladesh: exploration of genomic diversity and antimicrobial resistance. *MBio*, 9(6):e02112–18, 2018.
- [152] Ahtesham Ahmad Shad and Wajahat Ahmed Shad. Shigella sonnei: virulence and antibiotic resistance. *Archives of Microbiology*, 203(1):45–58, 2021.
- [153] Mike S Son, Christina J Megli, Gabriela Kovacikova, Firdausi Qadri, and Ronald K Taylor. Characterization of vibrio cholerae o1 el tor biotype variant clinical isolates from bangladesh and haiti, including a molecular genetic analysis of virulence genes. *Journal of Clinical Microbiology*, 49(11):3739–3749, 2011.
- [154] Marta Nieckarz, Patrycja Kaczor, Karolina Jaworska, Adrianna Raczowska, and Katarzyna Brzostek. Urease expression in pathogenic yersinia enterocolitica strains of bio-serotypes 2/o: 9 and 1b/o: 8 is differentially regulated by the ompr regulator. *Frontiers in Microbiology*, 11:607, 2020.
- [155] Julia Dai, Auris O Huen, Lori A Kestenbaum, Margaret D Sarezky, Carrie C Coughlin, and Albert C Yan. Achromobacter xylosoxidans bacteremia and cellulitis: a report of a case. *Pediatric Dermatology*, 32(4):e186–e187, 2015.
- [156] Aoife Howard, Michael O’Donoghue, Audrey Feeney, and Roy D Sleator. Acinetobacter baumannii: an emerging opportunistic pathogen. *Virulence*, 3(3):243–250, 2012.

- [157] Semiramis Castro-Jaimes, Elena Bello-López, Consuelo Velázquez-Acosta, Patricia Volkow-Fernández, Patricia Lozano-Zarain, Santiago Castillo-Ramírez, and Miguel Angel Cevallos. Chromosome architecture and gene content of the emergent pathogen acinetobacter haemolyticus. *Frontiers in Microbiology*, 11:926, 2020.
- [158] Nora G Regalado, Greg Martin, and Suresh J Antony. Acinetobacter lwoffii: bacteremia associated with acute gastroenteritis. *Travel Medicine and Infectious Disease*, 7(5):316–317, 2009.
- [159] P Espinal, H Seifert, L Dijkshoorn, J Vila, and I Roca. Rapid and accurate identification of genomic species from the acinetobacter baumannii (ab) group by maldi-tof ms. *Clinical Microbiology and Infection*, 18(11):1097–1103, 2012.
- [160] PATRIC Database. Bacillus mobilis strain 1428.155, Genome ID 2026190.21. <https://www.patricbrc.org/view/Genome/2026190.21>.
- [161] Nalini Ramarao, Seav-Ly Tran, Marco Marin, and Jasmina Vidic. Advanced methods for detection of bacillus cereus and its pathogenic factors. *Sensors*, 20(9):2667, 2020.
- [162] M Jeremiah Matson, Sarah L Anzick, Friederike Feldmann, Craig A Martens, Steven K Drake, Heinz Feldmann, Moses Massaquoi, Daniel S Chertow, and Vincent J Munster. Bacillus paranthracis isolate from blood of fatal ebola virus disease case. *Pathogens*, 9(6):475, 2020.
- [163] Hannah M Wexler. Bacteroides: the good, the bad, and the nitty-gritty. *Clinical Microbiology Reviews*, 20(4):593–621, 2007.
- [164] Magdolna Csávás, Lenka Malinovská, Florent Perret, Milán Gyurkó, Zita Tünde Illyés, Michaela Wimmerová, and Anikó Borbás. Tri- and tetravalent mannoclusters cross-link and aggregate bc2l-a lectin from burkholderia cenocepacia. *Carbohydrate Research*, 437:1–8, 2017.
- [165] Eshwar Mahenthiralingam, A Baldwin, and CG Dowson. Burkholderia cepacia complex bacteria: opportunistic pathogens with important natural biology. *Journal of Applied Microbiology*, 104(6):1539–1551, 2008.
- [166] Pengling Li, Min Wang, Xianping Li, Feihu Hu, Huan Song, Yixin Xie, Min Yang, and Aiguo Tang. Case report spontaneous bacterial peritonitis caused by oxidase negative campylobacter fetus subsp. testudinum isolated from the patient with decompensated liver cirrhosis: a case report and literatures review. *Int J Clin Exp Med*, 9(7):14866–14869, 2016.
- [167] Jun Hirai, Kohei Uechi, Mao Hagihara, Daisuke Sakanashi, Takeshi Kinjo, Shusaku Haranaga, and Jiro Fujita. Bacteremia due to citrobacter braakii: a case report and literature review. *Journal of Infection and Chemotherapy*, 22(12):819–821, 2016.
- [168] Ahmed Babiker, Daniel R Evans, Marissa P Griffith, Christi L McElheny, Mohamed Hassan, Lloyd G Clarke, Roberta T Mettus, Lee H Harrison, Yohei Doi, Ryan K Shields, et al. Clinical and genomic epidemiology of carbapenem-nonsusceptible citrobacter spp. at a tertiary health care center over 2 decades. *Journal of clinical microbiology*, 58(9):e00275–20, 2020.

- [169] Yukino Usui, Yoko Nukui, Ryuji Koike, Shuji Tohda, and Ryoichi Saito. Draft genome sequence of a *Clostridioides difficile* sequence type 97 strain belonging to hypervirulent clade 2. *Microbiology resource announcements*, 9(14):e00245–20, 2020.
- [170] Niharika Singh, Gunjan Goel, and Mamta Raghav. Insights into virulence factors determining the pathogenicity of *Cronobacter sakazakii*. *Virulence*, 6(5):433–440, 2015.
- [171] Michael Hombach, Hans R Frey, and Gaby E Pfyffer. Urinary tract infection caused by *Eikenella corrodens*. *Journal of Clinical Microbiology*, 45(2):675–675, 2007.
- [172] PATRIC Database. *Eikenella corrodens* strain EI\_09, Genome ID 539.170. <https://www.patricbrc.org/view/Genome/539.170>.
- [173] Kristin A Stormo, Randi M Nygaard, Torbjørn S Bruvold, Grete Dimmen, Paul Christoffer Lindemann, Stina Jordal, and Øyvind Kommedal. *Eikenella exigua* sp. nov., isolated from brain abscess and blood. *International Journal of Systematic and Evolutionary Microbiology*, 70(3):1478–1488, 2020.
- [174] Lisa R McTaggart, Patrick J Stapleton, AliReza Eshaghi, Deirdre Soares, Sylvain Brisse, Samir N Patel, and Julianne V Kus. Application of whole genome sequencing to query a potential outbreak of *Elizabethkingia anophelis* in Ontario, Canada. *Access Microbiology*, 1(2):e000017, 2019.
- [175] Medini K Annavaiah, Angela Gomez-Simmonds, and Anne-Catrin Uhlemann. Multidrug-resistant enterobacter *cloacae* complex emerging as a global, diversifying threat. *Frontiers in Microbiology*, 10:44, 2019.
- [176] Wenjing Wu, Yu Feng, and Zhiyong Zong. Characterization of a strain representing a new enterobacter species, *Enterobacter chengduensis* sp. nov. *Antonie van Leeuwenhoek*, 112(4):491–500, 2019.
- [177] Akira Uchida, Hie Lim Kim, Rikky W Purbojati, Vineeth Kodengil Vettath, Anjali B Gupta, James NI Houghton, Caroline Chénard, Anthony Wong, Megan E Clare, Kavita K Kushwaha, et al. Complete genome of enterobacter *sichuanensis* strain SGAir0282 isolated from air in Singapore. *Gut Pathogens*, 12(1):1–7, 2020.
- [178] Elizabeth Fiore, Daria Van Tyne, and Michael S Gilmore. Pathogenicity of enterococci. *Microbiology spectrum*, 7(4):7–4, 2019.
- [179] PATRIC Database. *Enterococcus faecalis* strain VNMU281, Genome ID 1351.3480. <https://www.patricbrc.org/view/Genome/1351.3480>.
- [180] Jacopo Monticelli, Anna Knezevich, Roberto Luzzati, and Stefano Di Bella. Clinical management of non-faecium non-faecalis vancomycin-resistant enterococci infection. focus on *Enterococcus gallinarum* and *Enterococcus casseliflavus/flavescens*. *Journal of Infection and Chemotherapy*, 24(4):237–246, 2018.

- [181] PATRIC Database. *Enterococcus gallinarum* strain EGR748, Genome ID 1353.134. <https://www.patricbrc.org/view/Genome/1353.134>.
- [182] Fahimeh Shooraj, Bahman Mirzaei, Seyed Fazlollah Mousavi, and Farzaneh Hosseini. Clonal diversity of *haemophilus influenzae* carriage isolated from under the age of 6 years children. *BMC Research Notes*, 12(1):565, 2019.
- [183] Ad C Fluit, Miquel B Ekkelenkamp, Michael M Tunney, J Stuart Elborn, Malbert RC Rogers, and Jumamurat R Bayjanov. Draft genome sequence of a *haemophilus parainfluenzae* strain isolated from a patient with chronic obstructive pulmonary disease. *Microbiology resource announcements*, 9(13):e00079–20, 2020.
- [184] Anne Davin-Regli et al. *Enterobacter aerogenes* and *enterobacter cloacae*; versatile bacterial pathogens confronting antibiotic treatment. *Frontiers in Microbiology*, 6:392, 2015.
- [185] Paul Chapman, Brian M Forde, Leah W Roberts, Haakon Bergh, Debra Vesey, Amy V Jenkinson, Susan Moss, David L Paterson, Scott A Beatson, and Patrick NA Harris. Genomic investigation reveals contaminated detergent as the source of an extended-spectrum- $\beta$ -lactamase-producing *klebsiella michiganensis* outbreak in a neonatal unit. *Journal of clinical microbiology*, 58(5):e01980–19, 2020.
- [186] Lavan Singh, MP Cariappa, and Mandeep Kaur. *Klebsiella oxytoca*: An emerging pathogen? *Medical Journal Armed Forces India*, 72:S59–S61, 2016.
- [187] Kazuo Imai, Noriomi Ishibashi, Masahiro Kodana, Norihito Tarumoto, Jun Sakai, Toru Kawamura, Shinichi Takeuchi, Yoshitada Taji, Yasuhiro Ebihara, Kenji Ikebuchi, et al. Clinical characteristics in blood stream infections caused by *klebsiella pneumoniae*, *klebsiella variicola*, and *klebsiella quasipneumoniae*: A comparative study, japan, 2014–2017. *BMC Infectious Diseases*, 19(1):946, 2019.
- [188] Emenike RK Eribe and Ingar Olsen. *Leptotrichia* species in human infections ii. *Journal of Oral Microbiology*, 9(1):1368848, 2017.
- [189] Luke V Blakeway, Aimee Tan, Ian RA Peak, and Kate L Seib. Virulence determinants of *moraxella catarrhalis*: distribution and considerations for vaccine development. *Microbiology*, 163(10):1371–1384, 2017.
- [190] Hui Liu, Junmin Zhu, Qiwen Hu, and Xiancai Rao. *Morganella morganii*, a non-negligent opportunistic pathogen. *International Journal of Infectious Diseases*, 50:10–17, 2016.
- [191] Jamal Saad, Nassim Hammoudi, Rita Zgheib, Hussein Anani, and Michel Drancourt. Geographic microevolution of *mycobacterium ulcerans* sustains buruli ulcer extension, australia. *bioRxiv*, 2020.
- [192] Rose C Lopeman, James Harrison, Maya Desai, and Jonathan AG Cox. *Mycobacterium abscessus*: environmental bacterium turned clinical nightmare. *Microorganisms*, 7(3):90, 2019.

- [193] Christiane Lourenço Nogueira, Keith E Simmon, Erica Chimara, Margo Cnockaert, Juan Carlos Palomino, Anandi Martin, Peter Vandamme, Barbara A Brown-Elliott, Richard J Wallace Jr, and Sylvia Cardoso Leao. *Mycobacterium franklinii* sp. nov., a species closely related to members of the mycobacterium chelonae–mycobacterium abscessus group. *International Journal of Systematic and Evolutionary Microbiology*, 65(7):2148–2153, 2015.
- [194] Heer H Mehta and Yousif Shamoo. Pathogenic nocardia: A diverse genus of emerging pathogens or just poorly recognized? *PLoS Pathogens*, 16(3):e1008280, 2020.
- [195] Yasutaka Hoshino, Kayo Watanabe, Soji Iida, Shin-ichi Suzuki, Takuji Kudo, Takahisa Kogure, Katsukiyo Yazawa, Jun Ishikawa, Reiner M Kroppenstedt, and Yuzuru Mikami. *Nocardia terpenica* sp. nov., isolated from japanese patients with nocardiosis. *International Journal of Systematic and Evolutionary Microbiology*, 57(7):1456–1460, 2007.
- [196] Ma G Aguilera-Arreola, Martha L Ostría-Hernández, Enrique Albarrán-Fernández, Sara R Juárez-Enriquez, Cristina Majalca-Martínez, Beatriz Rico-Verdín, Enrico A Ruiz, María del Socorro Ruiz-Palma, María R Morales-García, and Araceli Contreras-Rodríguez. Correct identification of *Ochrobactrum anthropi* from blood culture using 16rRNA sequencing: a first case report in an immunocompromised patient in mexico. *Frontiers in Medicine*, 5:205, 2018.
- [197] Peter Kämpfer, Holger C Scholz, Birgit Huber, Enevold Falsen, and Hans-Jürgen Busse. *Ochrobactrum haematophilum* sp. nov. and *ochrobactrum pseudogrignonense* sp. nov., isolated from human clinical specimens. *International Journal of Systematic and Evolutionary Microbiology*, 57(11):2513–2518, 2007.
- [198] Ahmed Olowo-Okere, Yakubu Kokori Enevene Ibrahim, Busayo Olalekan Olayinka, Joseph Olorunmola Ehinmidu, Yahaya Mohammed, Larbi Zakaria Nabti, Jean-Marc Rolain, and Seydina M Diene. First whole genome sequence of *paenalcaligenes suwonensis* bearing blavim-5 metallo- $\beta$ -lactamase: A clinical isolate responsible for acute gastroenteritis. *Infection, Genetics and Evolution*, 85:104513, 2020.
- [199] Sanghamitra Padhi, Muktikesh Dash, Rani Sahu, and Pritilata Panda. Urinary tract infection due to *paenibacillus alvei* in a chronic kidney disease: a rare case report. *Journal of Laboratory Physicians*, 5(2):133, 2013.
- [200] Zhongliang Zhu, Jiawen Lu, Ying Chen, and Fang He. *Pasteurella canis* infection caused by a dog bite leads to osteomyelitis and genomic analysis of the isolate. *Journal of Clinical Laboratory Analysis*, 34(7), 2020.
- [201] Andrey Shelenkov, Lyudmila Petrova, Valeria Fomina, Mikhail Zamyatin, Yulia Mikhaylova, and Vasiliy Akimkin. Multidrug-resistant *proteus mirabilis* strain with cointegrate plasmid. *Microorganisms*, 8(11):1775, 2020.
- [202] Dominika Drzewiecka. Significance and roles of *proteus* spp. bacteria in natural environments. *Microbial Ecology*, 72(4):741–758, 2016.



- [203] Karima Warda, Loubna Ait Said, Khalid Zerouli, Khalid Katfy, and Kawtar Zahlane. First report of a providencia stuartii strain coproducing a beta-metalloenzyme NDM-1 type and an oxacillinase type OXA-48. *International Journal of Collaborative Research on Internal Medicine & Public Health*, 10(1):0–0, 2018.
- [204] Jeffrey B Lyczak, Carolyn L Cannon, and Gerald B Pier. Establishment of pseudomonas aeruginosa infection: lessons from a versatile opportunist. *Microbes and Infection*, 2(9):1051–1060, 2000.
- [205] PATRIC Database. Pseudomonas nitroreducens strain SC-1148-IPA-05, Genome ID 46680.55. <https://www.patricbrc.org/view/Genome/46680.55>.
- [206] Brittan S Scales, Robert P Dickson, John J LiPuma, and Gary B Huffnagle. Microbiology, genomics, and clinical significance of the pseudomonas fluorescens species complex, an unappreciated colonizer of humans. *Clinical Microbiology Reviews*, 27(4):927–948, 2014.
- [207] Annelise Senkowski. *Characterizing three Pseudomonas milk isolates and interrogating specific similarities to cystic fibrosis clinical isolate, P. lundensis AU1044*. PhD thesis, University of Michigan, 2020.
- [208] Qingqing Fang, Yu Feng, Ping Feng, Xiaohui Wang, and Zhiyong Zong. Nosocomial bloodstream infection and the emerging carbapenem-resistant pathogen ralstonia insidiosa. *BMC Infectious Diseases*, 19(1):1–9, 2019.
- [209] Shuang Wang, Liuchen Xu, Xiaohui Chi, Yan Li, Zengqiang Kou, Peibin Hou, Hengjie Xie, Zhenwang Bi, and Beiwen Zheng. Emergence of ndm-1-and ctx-m-3-producing raoultella ornithinolytica in human gut microbiota. *Frontiers in microbiology*, 10:2678, 2019.
- [210] Piseth Seng, Boushab Mohamed Boushab, Fanny Romain, Frédérique Gouriet, Nicolas Bruder, Claude Martin, Franck Paganelli, Emmanuelle Bernit, Yves Patrice Le Treut, Pascal Thomas, et al. Emerging role of raoultella ornithinolytica in human infections: a series of cases and review of the literature. *International Journal of Infectious Diseases*, 45:65–71, 2016.
- [211] F Aujoulat, H Marchandin, I Zorogniotti, A Masnou, and E Jumas-Bilak. Rhizobium pusense is the main human pathogen in the genus agrobacterium/rhizobium. *Clinical Microbiology and Infection*, 21(5):472–e1, 2015.
- [212] C Léopold Kurz, Sophie Chauvet, Emmanuel Andrès, Marianne Aurouze, Isabelle Vallet, Gérard PF Michel, Mitch Uh, Jean Celli, Alain Filloux, Sophie de Bentzmann, et al. Virulence factors of the human opportunistic pathogen serratia marcescens identified by in vivo screening. *The EMBO Journal*, 22(7):1451–1460, 2003.
- [213] Anna Lavecchia, Matteo Chiara, Caterina De Virgilio, Caterina Manzari, Rosa Monno, Armando De Carlo, Carlo Pazzani, David Horner, Graziano Pesole, and Antonio Placido. Staphylococcus arlettae genomics: novel insights on candidate antibiotic resistance and virulence genes in an emerging opportunistic pathogen. *Microorganisms*, 7(11):580, 2019.

- [214] Steven YC Tong, Joshua S Davis, Emily Eichenberger, Thomas L Holland, and Vance G Fowler. Staphylococcus aureus infections: epidemiology, pathophysiology, clinical manifestations, and management. *Clinical Microbiology Reviews*, 28(3):603–661, 2015.
- [215] PATRIC Database. Staphylococcus aureus strain SA15KEN strain not applicable, Genome ID 1280.23630. <https://www.patricbrc.org/view/Genome/1280.23630>.
- [216] David Cameron, Jhih-Hang Jiang, Karl Hassan, Liam Elbourne, Kellie Tuck, Ian Paulsen, and Anton Peleg. Insights on virulence from the complete genome of staphylococcus capitis. *Frontiers in Microbiology*, 6:980, 2015.
- [217] Jorunn Pauline Cavanagh, Maria Pain, Fatemeh Askarian, Jack-Ansgar Bruun, Ilona Urbarova, Sun Nyunt Wai, Frank Schmidt, and Mona Johannessen. Comparative exoproteome profiling of an invasive and a commensal staphylococcus haemolyticus isolate. *Journal of Proteomics*, 197:106–114, 2019.
- [218] PATRIC Database. Stenotrophomonas indicatrix strain AS012656, Genome ID 2045451.27. <https://www.patricbrc.org/view/Genome/2045451.27>.
- [219] Mareike Weber, Wiebke Schünemann, Janina Fuß, Peter Kämpfer, and André Lipski. Stenotrophomonas lactitubi sp. nov. and stenotrophomonas indicatrix sp. nov., isolated from surfaces with food contact. *International Journal of Systematic and Evolutionary Microbiology*, 68(6):1830–1838, 2018.
- [220] V Kalidasan, Narcisse Joseph, Suresh Kumar, Rukman Awang Hamat, and Vasantha Kumari Neela. Iron and virulence in stenotrophomonas maltophilia: all we know so far. *Frontiers in Cellular and Infection Microbiology*, 8:401, 2018.
- [221] Miki Matsue, Kohei Ogura, Hironori Sugiyama, Tohru Miyoshi-Akiyama, Yukiko Takemori-Sakai, Yasunori Iwata, Takashi Wada, and Shigefumi Okamoto. Pathogenicity characterization of prevalent-type streptococcus dysgalactiae subsp. equisimilis strains. *Frontiers in microbiology*, 11:97, 2020.
- [222] Kirsi Aaltonen, Ravi Kant, Marjut Eklund, Mirja Raunio-Saarnisto, Lars Paulin, Olli Vapalahti, Thomas Grönthal, Merja Rantala, and Tarja Sironen. Streptococcus halichoeri: Comparative genomics of an emerging pathogen. *International Journal of Genomics*, 2020, 2020.
- [223] Stephanie W Lo, Rebecca A Gladstone, Andries J Van Tonder, John A Lees, Mignon Du Plessis, Rachel Benisty, Noga Givon-Lavi, Paulina A Hawkins, Jennifer E Cornick, Brenda Kwambana-Adams, et al. Pneumococcal lineages associated with serotype replacement and antibiotic resistance in childhood invasive pneumococcal disease in the post-pcv13 era: an international whole-genome sequencing study. *The Lancet Infectious Diseases*, 19(7):759–769, 2019.
- [224] Jeffrey N Weiser, Daniela M Ferreira, and James C Paton. Streptococcus pneumoniae: transmission, colonization and invasion. *Nature Reviews Microbiology*, 16(6):355–367, 2018.

- [225] Lucia Gonzales-Siles, Roger Karlsson, Patrik Schmidt, Francisco Salvà-Serra, Daniel Jaén-Luchoro, Susann Skovbjerg, Edward RB Moore, and Margarita Gomila. A pangenome approach for discerning species-unique gene markers for identifications of streptococcus pneumoniae and streptococcus pseudopneumoniae. *Frontiers in Cellular and Infection Microbiology*, 10:222, 2020.
- [226] Muge Aydin Tufan, Kart-Koseoglu Hamide, Ersozlu-Bozkirli Duygu, Azap Ozlem, Tufan Kadir, and Yucel Ahmet Eftal. Spondylodiscitis and endocarditis caused by s. vestibularis. *Brazilian Journal of Infectious Diseases*, 14(4):377–379, 2010.
- [227] PATRIC Database. Streptococcus vestibularis strain as012761, Genome ID 1343.51. <https://www.patricbrc.org/view/Genome/1343.51>.
- [228] Lv Wang, Claus T Christophersen, Michael J Sorich, Jacobus P Gerber, Many T Angley, and Michael A Conlon. Increased abundance of sutterella spp. and ruminococcus torques in feces of children with autism spectrum disorder. *Molecular Autism*, 4(1):42, 2013.
- [229] PATRIC Database. Sutterella wadsworthensis strain 809h, Genome ID 40545.1254. <https://www.patricbrc.org/view/Genome/40545.1254>.
- [230] Di Zhao, Shangong Wu, Wenwen Feng, Ivan Jakovčić, Ngoc Tuan Tran, and Fan Xiong. Adhesion and colonization properties of potentially probiotic bacillus paralicheniformis strain fa6 isolated from grass carp intestine. *Fisheries Science*, 86(1):153–161, 2020.
- [231] PATRIC Database. Bacillus paralicheniformis strain 6-1, Genome ID 1648923.136. <https://www.patricbrc.org/view/Genome/1648923.136>.
- [232] Fouad MF Elshaghabee, Namita Rokana, Rohini D Gulhane, Chetan Sharma, and Harsh Panwar. Bacillus as potential probiotics: status, concerns, and future perspectives. *Frontiers in Microbiology*, 8:1490, 2017.
- [233] PATRIC Database. Bacillus subtilis strain 8-1, Genome ID 1423.1028. <https://www.patricbrc.org/view/Genome/1423.1028>.
- [234] PATRIC Database. Bacillus velezensis strain Marseille-Q1230, Genome ID 492670.508. <https://www.patricbrc.org/view/Genome/492670.508>.
- [235] Oleg N Reva, Dirk ZH Swanevelder, Liberata A Mwita, Aneth David Mwakilili, Dillon Muzondiwa, Monique Joubert, Wai Yin Chan, Stefanie Lutz, Christian H Ahrens, Lylia V Avdeeva, et al. Genetic, epigenetic and phenotypic diversity of four bacillus velezensis strains used for plant protection or as probiotics. *Frontiers in Microbiology*, 10:2610, 2019.
- [236] PATRIC Database. Bacteroides ovatus strain F11, Genome ID 28116.1355. <https://www.patricbrc.org/view/Genome/28116.1355>.
- [237] Huizi Tan, Zhiming Yu, Chen Wang, Qingsong Zhang, Jianxin Zhao, Hao Zhang, Qixiao Zhai, and Wei Chen. Pilot safety evaluation of a novel strain of bacteroides ovatus. *Frontiers in Genetics*, 9:539, 2018.

- [238] PATRIC Database. *Bacteroides uniformis* strain A23, Genome ID 820.4961. <https://www.patricbrc.org/view/Genome/820.4961>.
- [239] Alfonso Benítez-Páez, Eva M Gómez del Pulgar, and Yolanda Sanz. The glycolytic versatility of *bacteroides uniformis* cect 7771 and its genome response to oligo and polysaccharides. *Frontiers in Cellular and Infection Microbiology*, 7:383, 2017.
- [240] M Poyet, M Groussin, SM Gibbons, J Avila-Pacheco, X Jiang, SM Kearney, AR Perrotta, B Berdy, S Zhao, TD Lieberman, et al. A library of human gut bacterial isolates paired with longitudinal multiomics data enables mechanistic microbiome research. *Nature Medicine*, 25(9):1442–1452, 2019.
- [241] Philippe Ulsemer, Kawe Toutounian, Jens Schmidt, Uwe Karsten, and Steffen Goletz. Preliminary safety evaluation of a new *bacteroides xylanisolvens* isolate. *Applied and Environmental Microbiology*, 78(2):528–535, 2012.
- [242] Anna Pompei, Lisa Cordisco, Alberto Amaretti, Simona Zanoni, Diego Matteuzzi, and Maddalena Rossi. Folate production by bifidobacteria as a potential probiotic property. *Applied and Environmental Microbiology*, 73(1):179–185, 2007.
- [243] Gabriele Andrea Lugli, Walter Mancino, Christian Milani, Sabrina Duranti, Leonardo Mancabelli, Stefania Napoli, Marta Mangifesta, Alice Viappiani, Rosaria Anzalone, Giulia Longhi, et al. Dissecting the evolutionary development of the species *bifidobacterium animalis* through comparative genomics analyses. *Applied and environmental microbiology*, 85(7):e02806–18, 2019.
- [244] Francesca Turrone, Sabrina Duranti, Francesca Bottacini, Simone Guglielmetti, Douwe Van Sinderen, and Marco Ventura. *Bifidobacterium bifidum* as an example of a specialized human gut commensal. *Frontiers in Microbiology*, 5:437, 2014.
- [245] Erin Simpson, Fatemeh Sanjar, Dennis Wylie, Sowon Park, Hong Koh, Jaewoong Bae, Sun-Young Kook, Seokjin Kim, and Hyun Jung Kim. Draft genome sequences of two strains of *bifidobacterium dentium* isolated from a crude fecal extract used for fecal microbiota transplantation in the republic of korea. *Microbiology Resource Announcements*, 9(23):e00197–20, 2020.
- [246] Chyn Boon Wong, Toshitaka Odamaki, and Jin-zhong Xiao. Beneficial effects of *bifidobacterium longum* subsp. *longum* bb536 on human health: Modulation of gut microbiome as the principal action. *Journal of Functional Foods*, 54:506–519, 2019.
- [247] Guillaume A Durand, P-E Fournier, Didier Raoult, and Sophie Edouard. ‘*bittarella massiliensis*’ gen. nov., sp. nov. isolated by culturomics from the gut of a healthy 28-year-old man. *New Microbes and New Infections*, 16:28–29, 2017.
- [248] Guillaume A Durand, Thao Pham, Sokhna Ndongo, Sory Ibrahima Traore, Grégory Dubourg, Jean-Christophe Lagier, Caroline Michelle, Nicholas Armstrong, Pierre-Edouard Fournier, Didier

- Raoult, et al. *Blautia massiliensis* sp. nov., isolated from a fresh human fecal sample and emended description of the genus *blautia*. *Anaerobe*, 43:47–55, 2017.
- [249] Diane Hatzioanou, Cristina Gherghisan-Filip, Gerhard Saalbach, Nikki Horn, Udo Wegmann, Sylvia H Duncan, Harry J Flint, Melinda J Mayer, and Arjan Narbad. Discovery of a novel lantibiotic nisin o from *blautia obeum* a2-162, isolated from the human gastrointestinal tract. *Microbiology*, 163(9):1292, 2017.
- [250] PATRIC Database. *Blautia* sp. BIOML-A1, Genome ID 2584624.3. <https://www.patricbrc.org/view/Genome/2584624.3>.
- [251] Chengxu Liu, Sydney M Finegold, Yuli Song, and Paul A Lawson. Reclassification of *clostridium coccoides*, *ruminococcus hansenii*, *ruminococcus hydrogenotrophicus*, *ruminococcus luti*, *ruminococcus productus* and *ruminococcus schinkii* as *blautia coccoides* gen. nov., comb. nov., *blautia hansenii* comb. nov., *blautia hydrogenotrophica* comb. nov., *blautia luti* comb. nov., *blautia producta* comb. nov., *blautia schinkii* comb. nov. and description of *blautia wexlerae* sp. nov., isolated from human faeces. *International Journal of Systematic and Evolutionary Microbiology*, 58(8):1896–1902, 2008.
- [252] PATRIC Database. *Butyricoccus* sp. BIOML-A1, Genome ID 2584625.3. <https://www.patricbrc.org/view/Genome/2584625.3>.
- [253] PATRIC Database. *Catenibacterium* sp. BIOML-A1, Genome ID 2584626.3. <https://www.patricbrc.org/view/Genome/2584626.3>.
- [254] Zhen Shi and Hans P Blaschek. Transcriptional analysis of *clostridium beijerinckii* ncimb 8052 and the hyper-butanol-producing mutant ba101 during the shift from acidogenesis to solventogenesis. *Applied and Environmental Microbiology*, 74(24):7709–7714, 2008.
- [255] PATRIC Database. *Coprobacillus* sp. BIOML-A1, Genome ID 2584634.3. <https://www.patricbrc.org/view/Genome/2584634.3>.
- [256] PATRIC Database. *Coprococcus comes* strain F22, Genome ID 410072.542. <https://www.patricbrc.org/view/Genome/410072.542>.
- [257] PATRIC Database. *Coprococcus* sp. BIOML-A1, Genome ID 2584635.3. <https://www.patricbrc.org/view/Genome/2584635.3>.
- [258] David Taras, Rainer Simmering, Matthew D Collins, Paul A Lawson, and Michael Blaut. Reclassification of *eubacterium formicigenerans holdeman* and *moore* 1974 as *dorea formicigenerans* gen. nov., comb. nov., and description of *dorea longicatena* sp. nov., isolated from human faeces. *International Journal of Systematic and Evolutionary Microbiology*, 52(2):423–428, 2002.
- [259] PATRIC Database. *Dorea* sp. BIOML-A1, Genome ID 2584637.3. <https://www.patricbrc.org/view/Genome/2584637.3>.

- [260] Gina Paola Rodriguez-Castaño, Matthew R Dorris, Xingbo Liu, Bradley W Bolling, Alejandro Acosta-Gonzalez, and Federico E Rey. Bacteroides thetaiotaomicron starch utilization promotes quercetin degradation and butyrate production by eubacterium ramulus. *Frontiers in Microbiology*, 10:1145, 2019.
- [261] Andreas Schwiertz, Gwenaelle Le Blay, and Michael Blaut. Quantification of different eubacterium spp. in human fecal samples with species-specific 16s rRNA-targeted oligonucleotide probes. *Applied and Environmental Microbiology*, 66(1):375–382, 2000.
- [262] Mireia Lopez-Siles, Sylvia H Duncan, L Jesús Garcia-Gil, and Margarita Martinez-Medina. Faecalibacterium prausnitzii: from microbiology to diagnostics and prognostics. *The ISME Journal*, 11(4):841–852, 2017.
- [263] Leandro Benevides, Sriti Burman, Rebeca Martin, Véronique Robert, Muriel Thomas, Sylvie Miquel, Florian Chain, Harry Sokol, Luis G Bermudez-Humaran, Mark Morrison, et al. New insights into the diversity of the genus faecalibacterium. *Frontiers in Microbiology*, 8:1790, 2017.
- [264] Tasuku Ogita, Yoshinari Yamamoto, Ayane Mikami, Suguru Shigemori, Takashi Sato, and Takeshi Shimosato. Oral administration of flavonifractor plautii strongly suppresses Th2 immune responses in mice. *Frontiers in Immunology*, 11:379, 2020.
- [265] Ashley Toney, Yibo Xian, Jing Shao, Robert Schmaltz, Virginia Chaidez, Soonkyu Chung, and Amanda Ramer-Tait. Introducing gordonibacter urolithinfaciens into gut ecosystems to study its role in mediating the metabolic benefits of dietary polyphenols. *Current Developments in Nutrition*, 4(Supplement\_2):1594–1594, 2020.
- [266] MN Joshi, AS Pandit, A Sharma, RV Pandya, AK Saxena, and SB Bagatharia. Draft genome sequence of the halophilic bacterium halobacillus sp. strain bab-2008. *Genome Announcements*, 1(1), 2013.
- [267] Ajay Kumar Mishra, Jean-Christophe Lagier, Anne Pfeleiderer, Thi Thien Nguyen, Aurelia Caputo, Didier Raoult, and Pierre-Edouard Fournier. Non-contiguous finished genome sequence and description of holdemania massiliensis sp. nov. *Standards in Genomic Sciences*, 9(2):395–409, 2013.
- [268] Karim Naghmouchi, Yanath Belguesmia, Farida Bendali, Giuseppe Spano, Bruce S Seal, and Djamel Drider. Lactobacillus fermentum: A bacterial species with potential for food preservation and biomedical applications. *Critical Reviews in Food Science and Nutrition*, 60(20):3387–3399, 2020.
- [269] Valentina Taverniti and Simone Guglielmetti. Health-promoting properties of lactobacillus helveticus. *Frontiers in Microbiology*, 3:392, 2012.
- [270] Ji Hyun Choi, Chang Mo Moon, Tae-Seop Shin, Eun Kyoung Kim, Andrea McDowell, Min-Kyung Jo, Yang Hee Joo, Seong-Eun Kim, Hye-Kyung Jung, Ki-Nam Shim, et al. Lactobacillus paracasei-derived extracellular vesicles attenuate the intestinal inflammatory response by

- augmenting the endoplasmic reticulum stress pathway. *Experimental & Molecular Medicine*, 52(3):423–437, 2020.
- [271] Nieke Westerik, Remco Kort, Wilbert Sybesma, and Gregor Reid. Lactobacillus rhamnosus probiotic food as a tool for empowerment across the value chain in africa. *Frontiers in Microbiology*, 9:1501, 2018.
- [272] Xia Yu, Silja Åvall-Jääskeläinen, Joanna Koort, Agneta Lindholm, Johanna Rintahaka, Ingemar von Ossowski, Airi Palva, and Ulla Hynönen. A comparative characterization of different host-sourced lactobacillus ruminis strains and their adhesive, inhibitory, and immunomodulating functions. *Frontiers in Microbiology*, 8:657, 2017.
- [273] Thomas Clavel, Ramona Lippman, Françoise Gavini, Joël Doré, and Michael Blaut. Clostridium saccharogumia sp. nov. and lactonifactor longoviformis gen. nov., sp. nov., two novel human faecal bacteria involved in the conversion of the dietary phytoestrogen secoisolariciresinol diglucoside. *Systematic and Applied Microbiology*, 30(1):16–26, 2007.
- [274] Sudarshan Anand Shetty, Nachiket Prakash Marathe, Vikram Lanjekar, Dilip Ranade, and Yogesh S Shouche. Comparative genome analysis of megasphaera sp. reveals niche specialization and its potential role in the human gut. *PloS One*, 8(11):e79353, 2013.
- [275] Kaisa Hiippala, Gonçalo Barreto, Claudia Burrello, Angelica Diaz-Basabe, Maiju Suutarinen, Veera Kainulainen, Jolene R Bowers, Darrin Lemmer, David M Engelthaler, Kari K Eklund, et al. Novel odoribacter splanchnicus strain and its outer membrane vesicles exert immunoregulatory effects in vitro. *Frontiers in Microbiology*, 11:2906, 2020.
- [276] Kai Wang, Mingfang Liao, Nan Zhou, Li Bao, Ke Ma, Zhongyong Zheng, Yujing Wang, Chang Liu, Wenzhao Wang, Jun Wang, et al. Parabacteroides distasonis alleviates obesity and metabolic dysfunctions via production of succinate and secondary bile acids. *Cell Reports*, 26(1):222–235, 2019.
- [277] Tsung-Ru Wu, Chuan-Sheng Lin, Chih-Jung Chang, Tzu-Lung Lin, Jan Martel, Yun-Fei Ko, David M Ojcius, Chia-Chen Lu, John D Young, and Hsin-Chih Lai. Gut commensal parabacteroides goldsteinii plays a predominant role in the anti-obesity effects of polysaccharides isolated from hirsutella sinensis. *Gut*, 68(2):248–262, 2019.
- [278] Mitsuo Sakamoto and Yoshimi Benno. Reclassification of bacteroides distasonis, bacteroides goldsteinii and bacteroides merdae as parabacteroides distasonis gen. nov., comb. nov., parabacteroides goldsteinii comb. nov. and parabacteroides merdae comb. nov. *International Journal of Systematic and Evolutionary Microbiology*, 56(7):1599–1605, 2006.
- [279] Tingting Ju, Ji Yoon Kong, Paul Stothard, and Benjamin P Willing. Defining the role of parasutterella, a previously uncharacterized member of the core gut microbiota. *The ISME Journal*, 13(6):1520–1534, 2019.

- [280] Feifan Wu, Xianfeng Guo, Jiachun Zhang, Min Zhang, Zihao Ou, and Yongzheng Peng. Phascolarctobacterium áfaecium abundant colonization in human gastrointestinal tract. *Experimental and Therapeutic Medicine*, 14(4):3122–3126, 2017.
- [281] PATRIC Database. Piscibacillus halophilus strain Marseille-Q1613, Genome ID 571933.10. <https://www.patricbrc.org/view/Genome/571933.10>.
- [282] D Ricaboni, M Mailhe, A Benezech, C Andrieu, P-E Fournier, and Didier Raoult. ‘pseudoflavonifactor phocaeensis’ gen. nov., sp. nov., isolated from human left colon. *New Microbes and New Infections*, 17:15–17, 2017.
- [283] Sylvia H Duncan, Rustam I Aminov, Karen P Scott, Petra Louis, Thaddeus B Stanton, and Harry J Flint. Proposal of roseburia faecis sp. nov., roseburia hominis sp. nov. and roseburia inulinivorans sp. nov., based on isolates from human faeces. *International Journal of Systematic and Evolutionary Microbiology*, 56(10):2437–2441, 2006.
- [284] Sabina Leanti La Rosa, Maria Louise Leth, Leszek Michalak, Morten Ejby Hansen, Nicholas A Pudlo, Robert Glowacki, Gabriel Pereira, Christopher T Workman, Magnus Ø Arntzen, Phillip B Pope, et al. The human gut firmicute roseburia intestinalis is a primary degrader of dietary  $\beta$ -mannans. *Nature Communications*, 10(1):1–14, 2019.
- [285] Xiaolei Ze, Yonit Ben David, Jenny A Laverde-Gomez, Bareket Dassa, Paul O Sheridan, Sylvia H Duncan, Petra Louis, Bernard Henrissat, Nathalie Juge, Nicole M Koropatkin, et al. Unique organization of extracellular amylases into amyloosomes in the resistant starch-utilizing human colonic firmicutes bacterium ruminococcus bromii. *MBio*, 6(5):e01058–15, 2015.
- [286] Min-Soo Kim, Seong Woon Roh, and Jin-Woo Bae. Ruminococcus faecis sp. nov., isolated from human faeces. *The Journal of Microbiology*, 49(3):487–491, 2011.
- [287] Andrei N Shkoporov, Andrei V Chaplin, Victoria A Shcherbakova, Natalia E Suzina, Lyudmila I Kafarskaia, Vladimir K Bozhenko, and Boris A Efimov. Ruthenibacterium lactatiformans gen. nov., sp. nov., an anaerobic, lactate-producing member of the family ruminococcaceae isolated from human faeces. *International Journal of Systematic and Evolutionary Microbiology*, 66:3041–3049, 2016.
- [288] Maria Pain, Runa Wolden, Daniel Jaén-Luchoro, Francisco Salvà-Serra, Beatriz Piñeiro Iglesias, Roger Karlsson, Claus Klingenberg, and Jorunn Pauline Cavanagh. Staphylococcus borealis sp. nov., isolated from human skin and blood. *International Journal of Systematic and Evolutionary Microbiology*, 70(12):6067–6078, 2020.
- [289] Ghalia Kaci, Denise Goudercourt, Véronique Dennin, Bruno Pot, Joel Dore, S Dusko Ehrlich, Pierre Renault, Hervé M Blottière, Catherine Daniel, and Christine Delorme. Anti-inflammatory properties of streptococcus salivarius, a commensal bacterium of the oral cavity and digestive tract. *Applied and Environmental Microbiology*, 80(3):928–934, 2014.



- [290] Kim Holmstrøm, Matthew D Collins, Trine Møller, Enevold Falsen, and Paul A Lawson. Subdoligranulum variabile gen. nov., sp. nov. from human feces. *Anaerobe*, 10(3):197–203, 2004.
- [291] Abigail L Glascock, Nicole R Jimenez, Sam Boundy, Vishal N Koparde, J Paul Brooks, David J Edwards, Jerome F Strauss III, Kimberly K Jefferson, Myrna G Serrano, Gregory A Buck, et al. Unique roles of vaginal megasphaera phylotypes in reproductive health. *Microbial Genomics*, 7(12):000526, 2021.
- [292] PATRIC Database. Veillonellaceae bacterium M2-8, Genome ID 2093855.3. <https://www.patricbrc.org/view/Genome/2093855.3>.
- [293] Wing Sun Faith Chung, Marjolein Meijerink, Birgitte Zeuner, Jesper Holck, Petra Louis, Anne S Meyer, Jerry M Wells, Harry J Flint, and Sylvia H Duncan. Prebiotic potential of pectin and pectic oligosaccharides to promote anti-inflammatory commensal bacteria in the human colon. *FEMS Microbiology Ecology*, 93(11):fx127, 2017.
- [294] Jaime A Rosero, Jir̃í Killer, Hana Sechovcová, Jakub Mrázek, Oldr̃ich Benada, Kater̃ina Fliegerová, Jaroslav Havlík, and Jan Kopečnỳ. Reclassification of eubacterium rectale (hauduroy et al. 1937) prévot 1938 in a new genus agathobacter gen. nov. as agathobacter rectalis comb. nov., and description of agathobacter ruminis sp. nov., isolated from the rumen contents of sheep and cows. *International Journal of Systematic and Evolutionary Microbiology*, 66(2):768–773, 2016.
- [295] Amadou Hamidou Togo, Awa Diop, Fadi Bittar, Marie Maraninchi, René Valero, Nicholas Armstrong, Grégory Dubourg, Noémie Labas, Magali Richez, Jeremy Delerce, et al. Description of mediterraneibacter massiliensis, gen. nov., sp. nov., a new genus isolated from the gut microbiota of an obese patient and reclassification of ruminococcus faecis, ruminococcus lactaris, ruminococcus torques, ruminococcus gnavus and clostridium glycyrrhizinilyticum as mediterraneibacter faecis comb. nov., mediterraneibacter lactaris comb. nov., mediterraneibacter torques comb. nov., mediterraneibacter gnavus comb. nov. and mediterraneibacter glycyrrhizinilyticus comb. nov. *Antonie van Leeuwenhoek*, 111(11):2107–2128, 2018.
- [296] Bianca J Parker, Pamela A Wearsch, Alida Veloo, and Alex Rodriguez-Palacios. The genus alistipes: gut bacteria with emerging implications to inflammation, cancer, and mental health. *Frontiers in immunology*, 11:906, 2020.
- [297] Kui Zhu, Christina S Hölzel, Yifang Cui, Ricarda Mayer, Yang Wang, Richard Dietrich, Andrea Didier, Rupert Bassitta, Erwin Märtlbauer, and Shuangyang Ding. Probiotic bacillus cereus strains, a potential risk for public health in china. *Frontiers in Microbiology*, 7:718, 2016.
- [298] PATRIC Database. Bacillus cereus strain 2-1, Genome ID 1396.2563. <https://www.patricbrc.org/view/Genome/1396.2563>.

- [299] Isabella Princess, T Natarajan, and Siddhartha Ghosh. When good bacteria behave badly: a case report of bacillus clausii sepsis in an immunocompetant adult. *Access Microbiology*, 2(4):e000097, 2020.
- [300] Roibeard F Thornton, Elizabeth C Murphy, Todd F Kagawa, Paul W O’Toole, and Jakki C Cooney. The effect of environmental conditions on expression of bacteroides fragilis and bacteroides thetaiotaomicron c10 protease genes. *BMC Microbiology*, 12(1):1–11, 2012.
- [301] PATRIC Database. Bacteroides thetaiotaomicron strain F9-2, Genome ID 818.1282. <https://www.patricbrc.org/view/Genome/818.1282>.
- [302] Pßraic È CuÝv, Tomas De Wouters, Rabina Giri, Stanislas Mondot, Wendy J Smith, HervÚ M BlottiŔre, Jakob Begun, and Mark Morrison. The gut bacterium and pathobiont bacteroides vulgatus activates nf-κb in a human gut epithelial cell line in a strain and growth phase dependent manner. *Anaerobe*, 47:209–217, 2017.
- [303] PJ Perez-Chaparro, C Gonçalves, LC Figueiredo, M Faveri, E Lobão, N Tamashiro, P Duarte, and M Feres. Newly identified pathogens associated with periodontitis: a systematic review. *Journal of Dental Research*, 93(9):846–858, 2014.
- [304] Luigi Nibali, Vanessa Sousa, Mehmet Davrandi, David Spratt, Qumasha Alyahya, Jose Dopico, and Nikos Donos. Differences in the periodontal microbiome of successfully treated and persistent aggressive periodontitis. *Journal of Clinical Periodontology*, 47(8):980–990, 2020.
- [305] Anne Jolivet-Gougeon, Jean-Louis Sixou, Zohreh Tamanai-Shacoori, and Martine Bonnaure-Mallet. Antimicrobial treatment of capnocytophaga infections. *International Journal of Antimicrobial Agents*, 29(4):367–373, 2007.
- [306] V Garcia, C Abat, V Moal, and J-M Rolain. Citrobacter amalonaticus human urinary tract infections, marseille, france. *New Microbes and New Infections*, 11:1–5, 2016.
- [307] N Cassir, S Benamar, and B La Scola. Clostridium butyricum: from beneficial to a new emerging pathogen. *Clinical Microbiology and Infection*, 22(1):37–45, 2016.
- [308] F Morio, H Jean-Pierre, L Dubreuil, E Jumas-Bilak, L Calvet, G Mercier, R Devine, and H Marchandin. Antimicrobial susceptibilities and clinical sources of dialister species. *Antimicrobial Agents and Chemotherapy*, 51(12):4498–4501, 2007.
- [309] Bradley J Gardiner, AY Tai, Despina Kotsanas, Michelle J Francis, Sally A Roberts, Susan A Ballard, Ralph K Junckerstorff, and Tony M Korman. Clinical and microbiological characteristics of eggerthella lenta bacteremia. *Journal of Clinical Microbiology*, 53(2):626–635, 2015.
- [310] Armand Paauw, Martien PM Caspers, Maurine A Leverstein-van Hall, Frank HJ Schuren, Roy C Montijn, Jan Verhoef, and Ad C Fluit. Identification of resistance and virulence factors in an epidemic enterobacter hormaechei outbreak strain. *Microbiology*, 155(5):1478–1488, 2009.

- [311] Michael S Gilmore, Don B Clewell, Yasuyoshi Ike, and Nathan Shankar. Enterococci: From commensals to leading causes of drug resistant infection [internet]. 2014.
- [312] Byung-Han Ryu, Jeongmin Hong, Jiwon Jung, Min Jae Kim, Heungsup Sung, Mi-Na Kim, Yong Pil Chong, Sung-Han Kim, Sang-Oh Lee, Yang Soo Kim, et al. Clinical characteristics and treatment outcomes of enterococcus durans bacteremia: a 20-year experience in a tertiary care hospital. *European Journal of Clinical Microbiology & Infectious Diseases*, 38(9):1743–1751, 2019.
- [313] Zixin Peng, Menghan Li, Wei Wang, Hongtao Liu, Séamus Fanning, Yujie Hu, Jianzhong Zhang, and Fengqin Li. Genomic insights into the pathogenicity and environmental adaptability of enterococcus hirae r17 isolated from pork offered for retail sale. *Microbiologyopen*, 6(6):e00514, 2017.
- [314] Tomomi Higashide, Mami Takahashi, Akira Kobayashi, Shinji Ohkubo, Mayumi Sakurai, Yutaka Shirao, Toshihiro Tamura, and Kazuhisa Sugiyama. Endophthalmitis caused by enterococcus mundtii. *Journal of Clinical Microbiology*, 43(3):1475–1476, 2005.
- [315] Bettina Sigrid Freyaldenhoven, Georg Schlieper, Rudolf Lütticken, and Ralf René Reinert. Enterococcus raffinosus infection in an immunosuppressed patient: case report and review of the literature. *Journal of Infection*, 51(3):e121–e124, 2005.
- [316] Ariane Neumann, Lars Björck, and Inga-Maria Frick. Finegoldia magna, an anaerobic gram-positive bacterium of the normal human microbiota, induces inflammation by activating neutrophils. *Frontiers in Microbiology*, 11:65, 2020.
- [317] Holger Brüggemann, Anders Jensen, Seven Nazipi, Hüsnü Aslan, Rikke Louise Meyer, Anja Poehlein, Elzbieta Brzuszkiewicz, Munir A Al-Zeer, Volker Brinkmann, and Bo Söderquist. Pan-genome analysis of the genus finegoldia identifies two distinct clades, strain-specific heterogeneity, and putative virulence factors. *Scientific Reports*, 8(1):1–11, 2018.
- [318] Yali Cao, Min Qiao, Zhigang Tian, Yan Yu, Baohua Xu, Wansheng Lao, Xuguo Ma, and Wenge Li. Comparative analyses of subgingival microbiome in chronic periodontitis patients with and without iga nephropathy by high throughput 16s rna sequencing. *Cellular Physiology and Biochemistry*, 47(2):774–783, 2018.
- [319] Patrick CY Woo, Jade LL Teng, Kay KM Lam, WS Cindy, Kit-Wah Leung, Anthony WS Leung, Susanna KP Lau, and Kwok-Yung Yuen. First report of gordonibacter pamelaee bacteremia. *Journal of Clinical Microbiology*, 48(1):319–322, 2010.
- [320] Chun Yang, Di Wang, Qi Zhou, and Jiancheng Xu. Bacteremia due to vancomycin-resistant leuconostoc lactis in a patient with pneumonia and abdominal infection. *The American Journal of the Medical Sciences*, 349(3):282–283, 2015.

- [321] Joon Yong Kim, Yeon Bee Kim, Hye Seon Song, Won-Hyong Chung, Changsu Lee, Seung Woo Ahn, Se Hee Lee, Min Young Jung, Tae-Woon Kim, Young-Do Nam, et al. Genomic analysis of a pathogenic bacterium, paeniclostridium sordellii cba7122 containing the highest number of rna operons, isolated from a human stool sample. *Frontiers in Pharmacology*, 8:840, 2017.
- [322] Patrizia Posteraro, Flavio De Maio, Giulia Menchinelli, Ivana Palucci, Federica Maria Errico, Mariantonietta Carbone, Maurizio Sanguinetti, Antonio Gasbarrini, and Brunella Posteraro. First bloodstream infection caused by prevotella copri in a heart failure elderly patient with prevotella-dominated gut microbiota: a case report. *Gut Pathogens*, 11(1):44, 2019.
- [323] Zachary D Wallen, Mary Appah, Marissa N Dean, Cheryl L Sesler, Stewart A Factor, Eric Molho, Cyrus P Zabetian, David G Standaert, and Haydeh Payami. Characterizing dysbiosis of gut microbiome in pd: Evidence for overabundance of opportunistic pathogens. *npj Parkinson's Disease*, 6(1):1–12, 2020.
- [324] Michael Buhl and Matthias Marschal. Prevotella vespertina sp. nov., isolated from an abscess of a hospital patient. *International Journal of Systematic and Evolutionary Microbiology*, 70(8):4576–4582, 2020.
- [325] PATRIC Database. Prevotella sp. strain P-A-F\_MAG\_00002, Genome ID 59823.699. <https://www.patricbrc.org/view/Genome/59823.699>.
- [326] Michael Otto. Staphylococcus epidermidis — the 'accidental' pathogen. *Nature Reviews Microbiology*, 7(8):555–567, 2009.
- [327] PATRIC Database. Staphylococcus epidermidis strain JH, Genome ID 1282.3805. <https://www.patricbrc.org/view/Genome/1282.3805>.
- [328] Vanessa N Raabe and Andi L Shane. Group b streptococcus (streptococcus agalactiae). *Microbiology spectrum*, 7(2):7–2, 2019.
- [329] Qiurong Chen, Guojun Wu, Hui Chen, Hui Li, Shuo Li, Chenhong Zhang, Xiaoyan Pang, Linghua Wang, Liping Zhao, and Jian Shen. Quantification of human oral and fecal streptococcus parasanguinis by use of quantitative real-time pcr targeting the groel gene. *Frontiers in Microbiology*, 10:2910, 2019.
- [330] Wirginia Krzyściak, KK Pluskwa, Anna Jurczak, and Dorota Kościelniak. The pathogenicity of the streptococcus genus. *European Journal of Clinical Microbiology & Infectious Diseases*, 32(11):1361–1376, 2013.
- [331] Fernando Cobo, Virginia Pérez-Carrasco, José A García-Salcedo, and José María Navarro-Marí. Bacteremia caused by veillonella dispar in an oncological patient. *Anaerobe*, 66:102285, 2020.
- [332] Steven Knapp, Clint Brodal, John Peterson, Fengxia Qi, Jens Kreth, and Justin Merritt. Natural competence is common among clinical isolates of veillonella parvula and is useful for genetic

manipulation of this key member of the oral microbiome. *Frontiers in Cellular and Infection Microbiology*, 7:139, 2017.

- [333] J-H Chia, Y Feng, L-H Su, T-L Wu, C-L Chen, Y-H Liang, and C-H Chiu. Clostridium innocuum is a significant vancomycin-resistant pathogen for extraintestinal clostridial infection. *Clinical Microbiology and Infection*, 23(8):560–566, 2017.
